# Supplementary material for: Identification of a hub gene in hepatocellular carcinoma induced by nonalcoholic fatty liver disease using bioinformatics analysis
Source: Research Square preprint supplement (doi:10.21203/rs.3.rs-1523897/v1), 2022-04-07
Supplement: Supplementary file 1 [file 466c1b603b52163e2ae0d52d.xlsx]

## Sheet: Table S1
	GS.Normal	GS.Cirrhotic	GS.NASH	GS.HCC
HIST1H3G	0.278833	0.335202	-0.119255	-0.156097
TNFAIP8L1	0.155878	0.0792738	-0.110299	0.0101506
OTOP2	0.275676	0.158905	-0.106223	-0.0830644
C17orf78	7.61031e-05	0.0189568	-0.0669605	0.0601284
CTAGE6	0.0669112	0.245687	-0.10803	-0.0350994
LOC285501	0.185307	-0.0789709	-0.0417466	0.00324052
SAMD7	0.0667496	0.0756505	-0.100007	0.0388296
ARRDC5	0.0226885	0.312467	-0.0127037	-0.147409
C1orf173	0.156415	0.0821486	-0.077269	-0.0256597
FAM86C	0.0281254	-0.00977045	-0.12425	0.121492
HIST1H2BI	0.257605	0.0140864	-0.256662	0.150279
HIST1H4E	-0.0853428	0.00399138	0.0100533	0.0236503
HIST1H2AJ	0.134352	0.0439804	-0.0880493	0.0132483
HIST1H2BF	-0.0308172	0.0331601	-0.210503	0.214895
C2CD4B	0.0694879	0.226355	-0.160622	0.0276015
HIST1H2BE	-0.0668131	-0.117278	0.0124116	0.0719963
HIST1H3A	0.207533	0.0434099	-0.0591829	-0.0472186
RAB3D	0.165561	0.101786	-0.0902943	-0.025521
PDZD9	0.0173832	0.0159911	-0.0570893	0.0440444
CACNG8	0.107672	0.152994	-0.329334	0.22161
MORC2	0.123208	0.163417	-0.171286	0.046403
HIST1H2BN	0.0576989	0.136607	-0.393838	0.31738
GPR32	0.179725	0.261203	-0.075164	-0.124193
PCDHGB5	-0.123976	-0.198778	-0.0142058	0.163039
ZNF600	0.0310149	-0.0381866	-0.218693	0.231777
KRTAP6-2	-0.101378	0.310318	-0.0826378	-0.021656
KRTAP20-1	0.342768	0.170196	-0.163233	-0.0577929
HIST1H2BH	-0.125369	0.270656	-0.194905	0.123851
PCDHGA1	0.191539	-0.0594469	-0.0588971	0.00893328
GLIPR1L2	0.0405091	0.0885145	-0.0140797	-0.0452784
SNAPC5	0.0294523	-0.00349884	0.45067	-0.477286
OR8U9	-0.167141	-0.00917445	0.0983357	-0.0268901
IFNA10	0.178605	0.06612	-0.073293	-0.0313873
PCDHA13	0.350573	0.166669	-0.179742	-0.0422876
PCDHGB3	0.0337996	0.225695	-0.0480537	-0.0735674
GSC2	0.347207	0.219957	-0.154386	-0.0928687
OR9Q2	-0.0497438	0.115234	-0.31099	0.287244
KRTAP19-7	0.253337	0.206197	-0.107394	-0.0952864
KRTAP20-2	0.0494706	0.0947537	-0.129693	0.0676172
SSX7	-0.062116	-0.0799176	-0.259704	0.33367
C3orf15	0.211277	0.231979	-0.204149	0.0101567
HIST2H2AB	-0.0892102	-0.134403	-0.016543	0.119691
PCDHA4	0.28329	0.378942	-0.226202	-0.0683956
PRB3	0.223129	0.285687	-0.124754	-0.102989
PCDHGB1	0.0107557	-0.015212	-0.0315602	0.0354883
ZNF675	0.035665	0.0806909	0.0130857	-0.0675782
KRTAP6-1	-0.0357691	0.049947	-0.207366	0.205623
KRTAP19-2	-0.0160973	0.0838515	-0.0315574	-0.00106195
KRTAP19-4	-0.0127306	-0.0104495	-0.106592	0.120768
SFT2D1	0.0460069	0.185537	-0.100317	-0.00520411
LOC650293	-0.0619342	-0.0482659	-0.134078	0.188244
KRTAP21-2	-0.0921528	-0.112838	0.018919	0.0737989
HIST1H2AK	0.113182	0.28049	-0.139764	-0.0385759
DEFB128	-0.0668874	0.0213942	-0.179006	0.203182
IGLL3	0.134981	0.282079	-0.345292	0.164237
DNAJC12	0.205035	-0.0942542	0.24897	-0.298657
ARHGAP22	0.252682	0.254767	-0.0384914	-0.189812
POU3F3	0.310472	0.240457	-0.314976	0.0789665
PLEKHG2	-0.210863	-0.216035	0.259027	-0.0748481
HNRNPCL1	0.0637128	0.0665684	-0.229277	0.178326
DEPDC5	-0.0842942	0.0454741	0.222501	-0.216775
KRTAP10-12	-0.0401813	0.140414	-0.0394611	-0.0100568
KRTAP10-1	0.164771	0.0885071	-0.0513538	-0.0590843
KRTAP10-3	0.121992	0.203441	-0.0705364	-0.0767267
TDRKH	-0.0852175	-0.122467	-0.117575	0.216833
OR2A14	-0.0985294	0.0251378	-0.165149	0.20037
KRTAP19-1	0.242182	0.244466	-0.0409705	-0.17784
KRTAP10-9	0.0233785	-0.0185554	-0.166004	0.170964
ZNF391	0.0629179	0.0332945	0.100718	-0.146889
RPL38	-0.0552081	0.00596304	-0.0133009	0.034168
PRB1	0.0406158	-0.0686092	-0.00244738	0.0185611
H3F3C	0.147526	0.23175	-0.206703	0.0397932
C7orf46	0.158843	0.0341921	-0.122093	0.0428949
UNCX	0.230555	0.157393	-0.175545	0.00845746
ZNF835	0.0436292	0.1865	-0.264796	0.165611
IMPACT	-0.0339479	-0.171482	0.0239603	0.0723753
TMEM211	0.0127941	0.26403	-0.0811768	-0.0489435
PYGO1	0.0940614	0.225077	-0.0837496	-0.0617252
TCEAL1	-0.179314	-0.0199686	0.0915131	-0.00947803
ATP13A5	0.0590359	0.191417	-0.16734	0.0558466
HIST2H2AC	-0.11673	0.185311	-0.129067	0.0932907
PSG4	-0.0311727	-0.0869021	0.0704677	-0.0178134
WDFY4	-0.0327086	0.302629	-0.0664558	-0.0636489
CLCN6	0.0996498	0.0369233	-0.156755	0.102419
SCAND1	0.12952	0.480395	-0.218799	-0.0602443
PNMAL1	0.0121511	0.116117	-0.00218234	-0.0589756
ZNF680	0.0185264	-0.174207	0.194815	-0.125313
MARK4	0.122308	0.152698	-0.0752668	-0.0474424
GRK7	-0.0382305	0.140231	0.0183231	-0.0706123
UGT2B28	0.277253	0.100871	-0.159805	-0.000214848
MOGAT2	0.104473	0.118079	0.0705254	-0.174124
FAM127A	-0.193549	-0.0707682	-0.194234	0.316892
HIST1H2AI	-0.0510852	0.0669772	-0.312114	0.312293
C2orf44	0.026174	-0.0338097	0.0569907	-0.0536987
NSUN5	0.255143	0.0953917	-0.224892	0.0791367
MAGI3	-0.100144	-0.178793	0.310699	-0.193025
RNASE8	0.0720985	0.0352042	-0.267236	0.229243
ACOXL	0.160292	0.219897	-0.0247315	-0.148248
VPS54	-0.146085	-0.170887	0.513397	-0.387318
PCDHA6	0.334155	0.124342	-0.198901	0.00492294
PCDHA7	0.206959	0.220364	-0.119085	-0.0704722
OSTBETA	-0.117874	-0.108425	-0.270115	0.381736
GRIP2	0.0581207	0.113072	-0.164851	0.0915139
PARD6A	0.106837	0.109296	-0.123739	0.0302358
RPL36	0.157329	0.205603	-0.366188	0.213402
C21orf56	0.103157	0.0500267	-0.22209	0.162246
UCN	0.119957	0.337499	-0.153504	-0.0547571
UQCRHL	-0.23769	-0.0995721	-0.136874	0.290043
PCDHGA12	0.109407	0.348058	-0.176502	-0.0316026
RPL9	-0.25681	-0.167161	0.138063	0.0461375
IFITM3	-0.0232049	-0.273386	-0.179307	0.327521
ZNF184	0.216289	0.178312	-0.0691817	-0.105748
LCE1D	0.0667816	0.173496	-0.220757	0.116541
LCE3D	-0.137878	0.0368777	0.0801537	-0.0426602
LCE1F	0.28059	0.335188	-0.191901	-0.0816247
LCE1A	0.0728338	0.209665	-0.0551157	-0.0749696
IGLL1	0.129619	0.161716	0.0149416	-0.148271
BAI1	0.323996	0.271495	-0.184475	-0.0768367
CRISP2	-0.0149279	-0.0179318	0.0166199	-0.00224594
MAGEA12	0.0701264	-0.0614777	-0.206055	0.213456
C5orf36	0.243543	0.0914719	-0.0693134	-0.0751405
CHST7	0.199307	0.0740883	0.3219	-0.453092
RSRC1	0.291066	-0.0498268	-0.096839	0.00159594
DEFB134	-0.00139705	-0.242479	-0.0227756	0.141341
TAS2R30	0.0753969	0.157269	-0.113741	0.00996078
XAGE3	0.0281798	-0.078028	-0.0917168	0.120773
PTMS	0.221272	-0.165914	0.144801	-0.163035
C1orf66	-0.0732727	0.128236	0.12195	-0.15732
MTNR1A	0.0747686	0.151324	-0.174333	0.0758267
SPEF2	-0.103099	0.0984468	-0.123941	0.124212
UTS2R	0.420465	0.167868	-0.188461	-0.0633123
FIG4	-0.0159274	0.113529	-0.0445186	-0.00205637
PKD1L3	0.0515507	0.219653	0.10426	-0.235816
EPPK1	-0.0318116	-0.0769905	-0.0432655	0.0954089
ALG1L	0.231443	0.260989	-0.174715	-0.0428367
KLF7	-0.000961807	-0.170266	0.0596627	0.0209172
UGT2B11	-0.0805784	-0.117865	-0.251921	0.351735
TPM2	-0.0360257	0.0189264	0.098421	-0.0958454
SSX1	-0.00653145	-0.10326	-0.220391	0.280813
AURKAIP1	0.245713	-0.00728856	-0.0497664	-0.0485675
PGAM4	0.101009	0.253215	0.0209062	-0.186597
KRT17	-0.00599851	0.0132275	-0.249793	0.254736
ASIP	0.204704	0.253452	-0.0691272	-0.13723
CCKAR	0.0945343	0.154817	0.0362623	-0.152215
C15orf40	0.242978	0.0584559	-0.242857	0.120713
CASP14	0.204525	0.102962	-0.100783	-0.0316611
AGRP	-0.0346837	0.053444	0.0466535	-0.0594987
CLDN3	0.120172	0.068004	-0.125077	0.0459519
TBX5	0.0238894	-0.0195371	-0.153743	0.15853
ST8SIA1	0.0299003	0.468167	-0.0789632	-0.157094
TRPT1	-0.0960501	0.337248	-0.0761031	-0.0436811
HECTD2	-0.0671072	-0.182066	-0.026722	0.143941
CCL27	-0.0823259	-0.0648063	-0.104362	0.174072
KRT33A	0.367639	0.294948	-0.128903	-0.164104
FXN	-0.0666651	0.0995368	0.104005	-0.12766
SH2D2A	-0.0120322	0.239194	-0.261138	0.159832
SSX3	0.113607	-0.0597109	-0.186543	0.174068
NOP16	0.230996	0.273097	-0.201554	-0.0207143
NT5C1A	-0.0650444	0.130367	-0.0498817	0.0160702
CEMP1	0.0933561	0.145445	0.0538835	-0.165432
PLCB3	0.240635	0.421172	-0.119866	-0.1809
HOXA10	0.0132123	-0.0773209	-0.34003	0.383809
AREG	-0.106795	-0.14746	-0.0617323	0.180198
MLXIPL	0.231065	0.166479	0.0295119	-0.208433
FOXC2	0.168085	0.272295	-0.228796	0.0344037
LHB	0.143838	-0.00768418	-0.111822	0.0588244
LOC100289135	0.223647	0.193297	-0.12157	-0.0618571
HLA-C	0.111579	-0.0618931	-0.0316633	0.0156383
CYP2C19	0.33845	-0.127664	0.353209	-0.446684
MAGEA1	0.234651	0.14093	0.0345857	-0.202852
TTN	-0.0559754	0.0123489	0.197441	-0.186766
KRTAP10-8	0.106698	-0.0372458	-0.0487012	0.0234246
FABP12	-0.0206498	-0.00575451	-0.0619365	0.0756081
NKX1-2	0.162554	0.200702	-0.0244326	-0.140236
C11orf90	0.0873553	0.161507	-0.00176186	-0.113057
FLJ44082	0.118985	0.076562	-0.055284	-0.0299366
SLC6A15	-0.0505775	-0.0877106	-0.0618495	0.127741
ZNF735	-0.0276891	0.0578664	0.0465965	-0.0645262
DSN1	-0.0607056	-0.12072	0.0754185	0.00585632
NXNL2	0.0255086	0.0936131	-0.247239	0.199962
OR6P1	-0.14094	-0.0745339	-0.0374824	0.134251
SP9	0.00719176	0.190959	-0.224903	0.137522
DCAF12L2	0.219304	0.0797427	-0.143596	0.0176498
C1orf129	0.113911	-0.103173	-0.0853517	0.090184
BRI3	-0.0184417	0.118225	-0.0304746	-0.0178046
MUC16	0.180882	0.1261	-0.28203	0.154764
GSTP1	0.0487871	0.114101	-0.2607	0.194181
ADAMTS15	0.259634	0.175298	-0.156352	-0.0323257
EBI3	0.209457	0.224609	-0.160927	-0.03026
HBB	-0.0624925	-0.0935735	0.0898944	-0.0214945
COX7C	-0.192118	-0.238243	0.111139	0.0810799
COL1A1	-0.135711	0.100668	-0.416643	0.439911
COL1A2	-0.0869822	-0.0845546	-0.321125	0.409983
CST3	0.210086	0.098764	-0.176273	0.0461744
TIMP1	-0.0361169	0.134709	-0.310208	0.271278
ATP6V0E1	-0.0487206	-0.224117	-0.215708	0.352156
A2M	0.249837	0.0973184	-0.125137	-0.0228284
SPDEF	0.140466	0.324106	-0.069733	-0.143657
Septin 2	-0.0658573	-0.183005	-0.034769	0.152199
SERPING1	0.481999	-0.00271635	0.0998063	-0.305258
NDUFA4	0.0197412	-0.135972	-0.0296613	0.0880883
LGALS3BP	0.132537	0.47378	-0.0678166	-0.214625
UBA1	0.231387	-0.251466	0.0713509	-0.0499196
MDH1	-0.00158732	-0.203074	-0.176415	0.281435
TRIM28	0.124269	-0.0422767	-0.0845486	0.0555577
CALR	0.11707	-0.00618617	-0.156489	0.115629
RPS11	0.274799	-0.0235127	-0.155889	0.0568716
COX4I1	0.145193	-0.0422269	-0.0862837	0.0485067
TG	-0.0816836	-0.0137005	-0.0687775	0.112266
LAPTM4B	-0.001352	0.165162	-0.289886	0.220864
PLD3	0.260235	0.233591	0.00678787	-0.229639
PHB2	0.0581428	-0.217067	0.151308	-0.0762659
REG1A	-0.00985976	-0.037973	-0.157384	0.18544
CDKN1A	-0.0205655	0.0101158	-0.212075	0.223335
FKBP1A	-0.112035	0.0887136	-0.278313	0.292497
MTCH1	0.179082	0.0253652	-0.0443663	-0.0418409
C3	0.217879	-0.290249	0.201566	-0.160287
CD81	0.297643	-0.0490237	0.151166	-0.258313
MAGED2	0.145901	0.154786	-0.0881552	-0.0450569
APEX1	-0.222052	-0.315867	0.157818	0.0828878
SLC25A5	-0.111933	-0.0890461	-0.187049	0.283872
ILF2	-0.238515	-0.222664	-0.160325	0.37415
COL6A1	0.365063	0.105941	-0.151645	-0.0481394
PSMB4	0.253634	-0.0319414	-0.182217	0.0971255
PRDX2	0.149085	-0.104738	-0.0681193	0.0582681
EPAS1	0.124767	0.0745571	-0.0442391	-0.0428404
TSC22D1	0.0902126	-0.11566	-0.227049	0.252904
COL3A1	-0.0965187	-0.0716793	-0.24284	0.326737
DDB1	0.02066	-0.0358693	-0.162062	0.176396
SKP1	0.0965138	0.053167	-0.217952	0.159246
LY6E	0.292382	0.257158	0.224331	-0.479796
CCT2	-0.0694083	-0.0941021	-0.31347	0.399261
BCAP31	-0.0546705	-0.222327	-0.229829	0.368419
FLNA	0.0708299	0.273071	-0.222098	0.0681039
NHP2L1	-0.14659	-0.134473	-0.0530964	0.181763
ARF4	0.100757	0.195252	-0.174247	0.0435512
AKR1B1	0.0298213	0.355194	-0.150337	-0.0285786
TMBIM1	-0.219263	0.0700524	-0.188488	0.253738
RBBP7	-0.113195	0.0925426	-0.00255979	0.00566174
PDIA6	0.13307	-0.198499	-0.110267	0.153963
TIMP3	-0.120725	0.0788938	-0.268091	0.290324
DAP	-0.0148373	0.0188636	-0.00334506	0.000603999
CTGF	-0.0182062	0.237343	-0.456413	0.365488
CPB1	0.164387	0.195516	-0.218741	0.0626551
DNAJB1	0.00145225	0.643108	-0.175615	-0.129576
TALDO1	0.178433	-0.0607141	-0.0167567	-0.0285541
ERGIC3	-0.00870535	-0.143118	-0.186506	0.26591
RPL10	-0.148809	0.0211244	0.392141	-0.353424
COL4A2	0.133202	0.312017	-0.464541	0.273974
KISS1	0.0890784	0.036361	-0.0714972	0.018885
SSR2	0.186112	-0.0840739	-0.102708	0.0684777
COX8A	0.298701	0.0314058	-0.141115	0.00495889
DHCR24	0.0146248	-0.22136	0.103399	-0.00624309
LYZ	-0.0975439	-0.0273213	-0.139028	0.198264
IGFBP4	-0.0945455	-0.416454	0.368335	-0.140209
ARHGDIB	-0.0548349	0.561658	-0.141314	-0.101992
TUFM	0.0391773	0.0582638	0.0253439	-0.0709122
TXN	0.0394816	-0.132342	-0.264896	0.321537
SRPR	0.151432	-0.119932	0.179066	-0.191278
DDX17	0.0772053	-0.208698	0.253412	-0.194051
TFRC	-0.0954278	0.027563	-0.165469	0.198222
GABARAP	0.0426894	-0.274862	0.0462832	0.066906
SST	-0.0390774	0.0163587	-0.312876	0.332478
MCL1	0.0771044	0.472005	-0.32071	0.0714163
PGRMC1	-0.180897	-0.296388	0.200432	0.0120055
FSCN1	0.154742	0.0513771	-0.120776	0.0349564
MORF4L1	-0.146823	-0.120012	0.083659	0.0332965
CYR61	0.0760994	0.0815698	-0.1661	0.100449
RPS25	0.147822	-0.0822897	-0.00703534	-0.0152842
CTSK	0.0984699	0.012705	-0.22516	0.185436
OXA1L	0.314657	-0.0561514	-0.00399856	-0.101408
CBX3	-0.156453	-0.106991	-0.35765	0.487931
TARDBP	-0.110694	-0.318605	0.115413	0.081155
IGFBP7	-0.116105	-0.0386577	-0.245122	0.321402
RPL18A	-0.000915256	0.179957	-0.0981206	0.0150049
LASP1	-0.0359828	-0.283009	-0.24119	0.401623
IARS	-0.0514008	-0.117391	-0.232828	0.319437
MAGED1	0.0300049	-0.0519226	0.205723	-0.200537
MFGE8	-0.038918	0.140256	-0.290906	0.249796
NDFIP1	-0.111714	-0.164113	-0.193406	0.326635
HERPUD1	0.140604	0.200368	-0.00270722	-0.15331
PSMD3	0.0646208	0.121836	-0.0798389	-0.00347021
SLC25A39	0.062619	0.0638182	-0.228924	0.17975
MLEC	0.0649922	-0.171428	0.0754508	-0.022677
HADHA	-0.0428937	-0.207655	0.0874003	0.0279507
COTL1	0.115483	0.392553	0.0277751	-0.267144
BAT1	0.0605557	0.384277	-0.0898633	-0.118198
CCT6A	-0.0854706	-0.144743	-0.229444	0.343517
PRPF8	0.0601737	-0.0723146	0.100243	-0.0942059
IFNGR2	0.0449029	-0.0445666	-0.0391244	0.0431052
LRP1	0.14597	-0.0161394	-0.106667	0.0566753
GPS1	0.0928756	0.144544	0.102098	-0.214708
IDH2	0.213165	0.108066	0.0135531	-0.156137
RPLP1	0.287961	-0.0632954	-0.140268	0.054374
RPS14	-0.182014	-0.162094	0.0717583	0.0807911
THY1	-0.150804	0.113007	-0.477418	0.503229
RPS8	0.0165395	-0.0648424	-0.0588769	0.085312
TMED10	-0.13553	-0.216744	0.344194	-0.194441
CBX1	-0.145117	-0.187373	-0.00676281	0.158738
TMEM109	-0.0888284	-0.0691666	-0.104317	0.178874
DAG1	0.301886	0.144354	-0.245657	0.0572632
GAS6	0.0536916	0.168163	-0.206487	0.109864
IMMT	-0.0790842	-0.0290092	0.00972201	0.037301
CYB5R3	0.265073	-0.100988	0.00294413	-0.0660215
QSOX1	0.0283253	0.262926	-0.0330819	-0.10475
TMEM59	0.0916366	0.170227	-0.0178521	-0.102418
YWHAQ	0.0233976	-0.0964865	0.0561261	-0.0213456
SCD	-0.0292052	-0.263288	0.126992	0.00807476
H1FX	-0.0893679	-0.14934	0.204946	-0.102322
PSMD2	-0.121394	-0.187312	-0.0525535	0.196109
COPZ1	-0.0058195	-0.0771885	-0.201229	0.248076
CD9	0.0648535	-0.0390766	-0.259225	0.259899
CLSTN1	-0.0614569	0.347953	-0.056012	-0.0842401
KDELR2	-0.180587	-0.379107	0.0218367	0.236738
PPM1G	0.154085	0.0246727	-0.204933	0.135261
RAC1	0.10704	0.0173366	0.00159187	-0.0551615
VKORC1	-0.088001	-0.246057	0.31953	-0.174784
TBCB	-0.0599443	0.197461	-0.0910211	0.0240875
SF3B2	0.13682	0.158176	-0.233593	0.107699
HLA-DPA1	-0.0855075	0.533335	-0.0777891	-0.141136
CAV1	-0.0240207	0.0485738	-0.228042	0.222737
PMP22	-0.0577215	-0.0169293	-0.200881	0.240483
MAPRE1	-0.153345	0.0217697	-0.185529	0.24621
MYL9	-0.0936788	0.392495	-0.333821	0.195425
DYNC1H1	0.110763	-0.0571648	0.0511525	-0.0720375
YWHAH	-0.096881	-0.223013	-0.112599	0.265187
RBM38	0.0589762	0.449742	-0.19603	-0.0392569
PSMB7	0.206817	-0.13567	0.124054	-0.150076
TFG	0.133786	0.0320479	-0.0862272	0.0173666
ANAPC5	0.320852	0.0766541	-0.128492	-0.0393143
PPP1R11	-0.157581	-0.233633	-0.149107	0.333709
SPARC	-0.205544	0.00970055	-0.189014	0.277662
SF3B5	-0.087115	0.0246125	-0.098829	0.127153
PPIB	0.12017	-0.255944	-0.172004	0.251075
ATP6V1H	0.235659	0.199515	-0.256462	0.0697205
PLOD1	0.00885832	-0.0733231	-0.112709	0.148379
TMX2	-0.0625391	-0.225189	-0.0825394	0.220638
BTG2	0.186641	0.334759	-0.326243	0.097277
NDUFAB1	0.150295	0.0189638	0.0371161	-0.110964
RNF130	-0.10987	-0.190213	0.287412	-0.159298
SDF4	0.318333	-0.00528137	-0.0465171	-0.0835232
CRYAB	-0.114074	0.167002	-0.115668	0.0871473
UFC1	-0.121818	-0.25178	-0.177634	0.356931
RNF114	0.175657	-0.0388563	-0.0406469	-0.0132132
SH3BGRL	-0.0112622	0.0936841	-0.183533	0.14948
RPL11	-0.0391757	-0.218484	0.1186	-0.000683148
ALDH2	-0.0147801	-0.293923	0.557655	-0.429048
FGB	0.38604	0.0033947	-0.0675589	-0.0944824
LAPTM4A	-0.138441	-0.0220626	0.0739608	-0.00752995
MAF1	-0.108069	0.0111222	0.00101108	0.0391484
TMEM14C	-0.0806061	-0.1659	-0.106731	0.224651
SERPINE1	0.341351	0.197085	-0.195464	-0.0368216
UGP2	-0.0745193	-0.151593	0.583654	-0.499552
LPCAT1	0.0125773	0.0538086	-0.129482	0.102741
TTC3	-0.0756425	-0.182679	0.472721	-0.369213
ATP6AP2	-0.220371	-0.188776	-0.327369	0.523055
C22orf28	-0.175265	-0.163679	-0.0914555	0.247679
ADIPOR1	0.0404619	-0.00948325	-0.261685	0.258431
TXNRD1	-0.115347	-0.165773	-0.374955	0.516918
FSTL1	-0.112141	-0.0158803	-0.221326	0.284088
PCOLCE	0.134677	-0.00475947	0.00598278	-0.0606832
C20orf43	0.0435529	0.029393	-0.15116	0.12392
COX5A	-0.204635	-0.131932	0.144939	-5.87229e-06
GLB1	-0.0438584	-0.162113	-0.216243	0.320698
SLC39A1	-0.139826	-0.0831023	-0.198823	0.30495
ERRFI1	0.427799	-0.092164	0.0699553	-0.208276
RPN2	0.0836348	-0.287337	-0.0384759	0.143416
STARD7	-0.0690492	-0.103177	-0.0436675	0.124181
PSMB8	0.146687	0.0260861	-0.0754234	0.00362264
TPM3	-0.0470414	-0.0697288	0.0816141	-0.0309601
PSMA5	-0.0722271	-0.0889114	-0.187741	0.26778
DCTN1	0.110835	0.0576126	-0.135735	0.0659435
IFITM1	-0.0403121	0.0937476	0.141761	-0.175061
C19orf56	0.0257436	-0.041301	0.216137	-0.214653
JUNB	0.29748	0.186159	-0.357304	0.154503
CCNG1	-0.118896	-0.0883622	-0.0622837	0.157314
NCSTN	0.12522	0.156657	-0.144202	0.0207828
NAP1L4	-0.0388629	0.0912406	-0.0883947	0.063808
PRNP	0.122396	-0.149775	-0.00295855	0.0238274
C12orf57	0.30958	-0.139812	0.0277766	-0.0917354
CREG1	-0.0702354	-0.23088	0.0437502	0.095892
KRT7	0.0392096	0.355005	0.0808508	-0.271784
PPA1	-0.121394	-0.20538	-0.160551	0.316645
ARPC5	-0.0401295	-0.170566	-0.175611	0.281146
CTRB2	0.0861924	0.0185404	0.0149207	-0.0607509
CD164	-0.0950792	-0.228484	-0.0714121	0.224432
ZFP36	0.0440769	-0.0158185	-0.245997	0.243726
CIRBP	-0.0375577	-0.207517	0.121562	-0.00973151
COX7B	0.22327	-0.196232	-0.148539	0.154454
NOLC1	0.0809964	0.184455	-0.1127	-0.00661522
SEC16A	0.35122	-0.0752779	0.0166352	-0.128945
WDR6	0.0694956	-0.20339	0.201263	-0.139378
PFN2	-0.00163737	-0.132005	0.0993945	-0.0384192
ITGA5	-0.0596406	-0.0325569	-0.072038	0.115459
MGEA5	-0.0746726	0.19207	0.048588	-0.111627
MB	-0.0539819	-0.0485196	0.169815	-0.129593
CTSC	-0.0941129	0.154288	-0.277548	0.25246
AKR1C3	-0.0398853	-0.2334	-0.2401	0.378169
NRD1	0.290915	-0.160744	-0.0147031	-0.029773
VOPP1	0.0279858	0.110925	-0.213558	0.155683
MSN	-0.155719	-0.0306222	-0.143182	0.22869
ZNHIT1	0.137382	-0.00375334	0.00881017	-0.0652371
CDC37	0.0808657	0.0141531	0.20359	-0.251705
C1orf43	-0.0933233	-0.317208	-0.0991655	0.295298
GOLM1	-0.0813279	0.112261	-0.203645	0.19087
ITM2B	-0.0997603	-0.194508	-0.0895938	0.22881
OAZ2	0.0619401	-0.117873	0.201613	-0.177879
ITGB1	-0.0583951	-0.110325	-0.336541	0.426341
CYP19A1	0.0133642	-0.0612538	-0.028406	0.0533717
PSMB3	-0.0185476	-0.13708	-0.0408453	0.116347
NIPSNAP1	-0.0457454	-0.30061	0.272107	-0.117146
TMEM123	-0.12775	-0.194145	-0.0474343	0.196792
CASC3	-0.0758715	-0.000746296	0.0637857	-0.0336808
SNX3	-0.147174	-0.268432	-0.00887101	0.200958
PPAP2B	0.194726	-0.0725887	0.059758	-0.108898
RCC2	-0.0242288	0.32765	-0.248924	0.109586
ATP5J	-0.0153087	-0.252575	0.0706347	0.0553823
KIAA1191	-0.123418	-0.297772	0.127656	0.0637779
NBL1	0.075431	0.214081	-0.171646	0.0424389
SSRP1	0.0425883	-0.0879135	-0.213173	0.245212
DPYSL3	0.0120349	0.0555387	-0.08027	0.0511869
TSPAN7	0.0765028	0.00110252	0.526479	-0.577831
PRL	-0.0615534	0.144128	-0.128015	0.0888357
ATIC	0.0123855	-0.110459	-0.121346	0.173778
UBL5	0.211575	-0.17444	-0.18865	0.19038
RGS2	0.0249855	0.0625798	-0.22967	0.19699
TTC1	0.0908773	0.0913478	-0.223822	0.14925
RPL36AL	-0.136368	0.0419669	0.157047	-0.125361
TBC1D14	-0.0450602	-0.0111732	0.133281	-0.113579
AP1M1	0.0646529	-0.0209304	-0.0437864	0.0281818
PODXL	-0.0638382	0.148742	-0.361972	0.329775
DUSP1	0.391713	0.227032	-0.254737	-0.0111663
ACAA2	0.0310506	-0.143086	0.443699	-0.40329
SIRT2	0.222548	0.116535	-0.0376017	-0.111228
SET	0.248659	0.0145547	-0.187891	0.0826283
MRPL13	0.130304	-0.00519454	-0.190881	0.145174
IMP3	0.118311	0.0118319	-0.0577493	0.00417907
HSPB8	-0.125202	0.10781	-0.233233	0.242152
HNRNPH2	-0.204426	-0.198068	-0.14624	0.333308
EEF2	0.0978765	-0.120491	-0.078867	0.0986004
PRR4	0.167899	0.0295231	-0.240698	0.164118
CRYBB2	0.0538103	0.156231	-0.133824	0.0403563
PLOD3	0.177936	0.314292	-0.29055	0.0738862
ATP6V0C	0.0342607	0.237253	-0.148878	0.0250319
SLC40A1	-0.25638	-0.187371	0.427726	-0.244152
MRPL37	0.0960233	0.0468993	-0.0942426	0.0344113
TUBG1	-0.0411811	-0.037857	-0.116709	0.156482
STOM	-0.128903	0.0678965	0.178932	-0.163694
ACTG2	-0.0160695	0.113926	-0.229196	0.188999
MANF	0.0797036	-0.0836574	-0.276354	0.292913
LUM	-0.0937335	-0.0228919	-0.206194	0.26405
WDR45L	0.229014	0.270264	-0.0651489	-0.159723
BAT2L1	-0.0398392	-0.14269	0.0653556	0.0180917
ANXA6	0.0456497	-0.0780864	-0.227128	0.253619
PPP2CA	-0.135437	-0.118318	-0.0788721	0.195938
SEPW1	0.010682	0.124528	0.161168	-0.231529
STARD10	0.254112	-0.107918	0.203177	-0.265342
PYGB	0.136356	0.0646083	-0.172299	0.0896545
TRIP12	-0.204251	-0.117041	-0.0363758	0.180343
MLLT6	0.0298113	0.497237	-0.181304	-0.0651556
HIGD1A	-0.0528934	-0.154873	-0.180558	0.284066
TRAP1	0.10387	-0.127733	0.183257	-0.171792
PSMC3	0.061993	-0.177922	-0.159108	0.224553
ZFP36L2	0.0628262	0.334251	-0.103981	-0.0803652
LRPAP1	0.103432	0.316734	-0.234611	0.0462112
BUD31	-0.0476776	-0.101291	-0.127054	0.200584
SYPL1	-0.17273	-0.0706508	-0.329369	0.447956
NOP10	0.0373162	-0.146044	-0.232512	0.295546
PRMT1	0.265999	0.35609	-0.116334	-0.163803
HMG20B	0.0864942	0.126528	-0.0712495	-0.0238532
M6PR	-0.0484239	-0.0885115	0.285968	-0.232858
PLS3	0.109998	-0.238016	0.223688	-0.162939
SURF4	-0.110972	-0.274467	0.0471025	0.130661
RUVBL1	-0.0590907	0.0763617	0.138786	-0.155662
PSMA3	0.0508425	0.156482	0.0199364	-0.117695
HEXB	-0.167101	-0.220676	-0.241865	0.42749
NEU1	-0.0747953	-0.190755	-0.29081	0.424779
SDHC	-0.169754	-0.325592	-0.0945468	0.326796
MAPK1	-0.169852	0.0115328	-0.0661337	0.134514
PTPRF	0.271189	-0.187571	-0.0579056	0.036234
EFEMP1	-0.118985	0.0209017	-0.286416	0.336585
PLAT	-0.114005	0.250258	-0.375227	0.315595
ATP5G2	-0.0181543	-0.120546	-0.174704	0.246769
DDX47	0.0542339	-0.0551579	0.116412	-0.116731
C6orf48	-0.0974055	-0.0582328	-0.238812	0.316444
CLU	0.150373	0.0455007	0.213785	-0.306716
PDGFRB	-0.0752909	0.16559	-0.247635	0.208095
PRCP	0.173399	0.415075	0.0954359	-0.372495
NCKAP1	-0.0836488	-0.195219	0.0681052	0.0591022
RIC8A	-0.108992	-0.108453	-0.221249	0.327416
ACTN4	-0.00727684	-0.205687	-0.250932	0.362241
CDIPT	-0.0945819	-0.0040763	-0.259068	0.310053
DDAH2	0.132166	0.257258	-0.0520147	-0.126197
PTPLAD1	0.15324	-0.0334625	-0.19589	0.154349
ATP6V1F	-0.0603874	0.378254	-0.319811	0.173765
MRPL41	0.279635	0.151386	-0.306529	0.126266
TINF2	-0.0152272	-0.0422916	-0.00130056	0.0282039
UFD1L	0.179471	0.0741223	-0.123972	0.0168463
ZFAND3	0.0781156	-0.0684509	-0.248182	0.25707
OLFML3	-0.099085	0.0827255	0.327444	-0.337181
ATP5H	-0.0569109	0.0670849	-0.272741	0.273936
COMMD7	-0.216076	-0.179253	0.159197	0.0129249
TAX1BP3	-0.160232	-0.173701	-0.103442	0.258591
CDK2AP1	-0.112469	-0.22735	-0.116503	0.277897
PITPNA	-0.252248	-0.0296086	0.065335	0.0530357
DAP3	0.0203864	-0.147445	-0.00386805	0.066658
C7orf42	-0.2501	-0.362268	0.218429	0.0543903
PIP4K2B	0.0778117	0.230848	0.0969715	-0.244754
ATP5I	0.0760044	-0.0254091	0.15167	-0.176787
PNLIP	-0.022757	-0.00806261	0.00540546	0.0078961
PYCR2	-0.0612859	-0.154447	-0.196449	0.303851
IFI27	0.122647	0.0802573	-0.333876	0.255146
NGRN	0.174302	-0.191805	-0.160981	0.185843
SCARB2	-0.0360551	-0.11505	0.105169	-0.0380773
TNIP1	-0.0385786	-0.0920687	-0.0679169	0.131069
SUCLG1	0.130957	-0.011115	-0.119166	0.0735168
COASY	0.0293827	-0.0980824	-0.0309449	0.0670423
PSMC2	0.0466666	-0.100943	-0.238393	0.275898
DDX23	-0.0239392	0.0834196	0.0623872	-0.0948028
DDX3X	0.15638	0.0407862	-0.137781	0.0569878
FAM96B	-0.00437038	-0.0173207	-0.128627	0.143374
MYO6	-0.0531185	-0.0621856	-0.0615831	0.116203
EFNB1	-0.00564485	-0.20436	0.0711745	0.0274498
CD44	-0.131705	0.0213211	-0.015068	0.0608327
CD24	-0.18769	0.0492192	-0.0824607	0.140727
SH3BGRL3	-0.113546	-0.0269874	-0.268915	0.339314
PGRMC2	-0.0124984	-0.239356	0.303538	-0.193304
Septin 9	-0.0486535	-0.0679002	-0.270608	0.333474
GSS	-0.0699567	-0.0659224	0.280197	-0.22872
TRAM1	-0.0597953	-0.103962	-0.307075	0.393352
PLEC	0.0816104	0.0695616	-0.256201	0.197206
SH3GL1	0.213117	0.100006	0.0766106	-0.217503
SDHAF2	-0.121301	0.11452	-0.190027	0.192535
SGK1	0.350014	0.105932	-0.24068	0.0503837
TUBB6	-0.0785357	0.040632	-0.0629426	0.0786432
PPP1R7	0.406866	0.224501	-0.251691	-0.0194859
TAGLN	-0.0497562	0.54991	-0.345286	0.112706
NBEAL2	0.0410909	0.186453	-0.0482623	-0.0574629
KHDRBS1	0.11014	-0.0799701	-0.15443	0.152075
AQP1	-0.140562	0.104401	-0.114806	0.127674
PSMB1	0.0671502	-0.195533	0.0763211	-0.0128395
TSG101	0.0530831	-0.149259	-0.0687342	0.1209
RALB	-0.0414403	0.265451	-0.127947	0.0216574
KCTD12	-0.114902	-0.0425168	-0.155315	0.229787
MBTPS1	0.00897314	-0.113067	0.280994	-0.240047
CNDP2	0.0971388	0.161174	0.130656	-0.254107
ARL6IP5	0.0112333	0.00958945	-0.0213881	0.0127714
PEPD	-0.0867521	-0.103354	0.323772	-0.248662
RPL7	-0.00442615	-0.128053	-0.115362	0.183175
SREBF1	0.146166	-0.0501498	-0.22998	0.200688
NCBP2	0.123275	0.42486	-0.121996	-0.13099
ACTR10	-0.176608	-0.277839	0.0258303	0.18199
SPTAN1	0.0272867	-0.0496834	-0.00757583	0.0203454
ST14	0.0341138	0.218165	-0.313565	0.20481
NEDD8	-0.233785	-0.153379	0.093771	0.0756214
EPRS	-0.0962564	0.00872887	-0.201441	0.244913
PFKP	-0.0466316	0.0900687	-0.0198201	-0.00334184
SMOC2	-0.103602	0.199811	-0.339449	0.298547
FAM54B	-0.027277	-0.00534722	0.267833	-0.263189
VGLL4	-0.192467	0.0791825	-0.123877	0.171139
C3orf10	-0.0144072	-0.195753	-0.162772	0.269179
AIP	0.0492081	0.147984	-0.293629	0.21172
VPS11	-0.267213	0.125391	-0.0976977	0.153225
DUS1L	0.24328	-0.127328	-0.0946434	0.056924
ADNP	-0.217011	0.0549106	-0.0983395	0.166779
HTN3	-0.0414668	-0.0276969	-0.154608	0.190928
YPEL5	-0.193836	-0.19836	0.0727063	0.102319
GH1	0.154627	0.313767	-0.244442	0.0362362
ATP5G1	0.0478581	0.141021	-0.12966	0.0459044
JTB	-0.0031103	-0.218298	-0.0468729	0.155325
COX7A2L	-0.160501	-0.137987	0.0663606	0.0656585
MCM2	0.394535	0.305487	-0.220764	-0.0854381
SPG7	0.0121995	-0.0654077	0.346955	-0.332723
ID2	0.141117	-0.185426	-0.00327561	0.0334892
MRPL16	-0.155223	-0.24176	0.178439	-0.00245108
NOSIP	0.265278	0.13207	-0.0392645	-0.135032
NDUFC1	0.132081	0.123012	0.0781636	-0.196057
CAB39	0.0208237	-0.0254617	-0.108616	0.115968
FAF2	-0.165732	-0.0341009	-0.0472038	0.135231
HYOU1	0.256442	-0.127837	-0.323886	0.288944
RBM5	0.0248175	0.0120409	0.023976	-0.0411046
DYNC1LI2	0.0815249	0.339367	-0.0750396	-0.120684
TNFAIP1	0.186006	0.16893	-0.257119	0.106117
C11orf10	0.0380957	-0.243465	0.0158648	0.0851616
SERPINF1	0.0589709	-0.155465	0.103954	-0.0573594
CMTM3	-0.00316518	-0.115012	0.131395	-0.0791148
MAL2	-0.111392	-0.23672	-0.0395438	0.202299
RAB31	-0.0558268	0.185272	-0.198432	0.139438
RAD23A	0.0429141	0.0899087	-0.00499224	-0.0563741
ADRBK1	0.129328	0.276655	-0.0686741	-0.117127
GOLGA7	0.153225	0.243387	-0.231166	0.0570919
SELT	-0.00227407	-0.156238	-0.0599213	0.138492
NDUFB9	-0.0869958	-0.151699	-0.215932	0.333534
ARF3	-0.150957	0.00581918	-0.347451	0.420541
SLPI	-0.010973	-0.104689	-0.175628	0.237036
BST2	-0.102389	0.241822	0.0997995	-0.176999
GPAA1	-0.000953695	0.130278	-0.119587	0.0612509
SLC25A29	0.0658782	0.251688	-0.0092766	-0.139799
C19orf62	0.0562876	-0.0338163	-0.0295987	0.0232482
RPS5	0.155855	-0.0447035	-0.0443472	0.00179278
PPP2CB	-0.0506546	-0.0014544	0.105284	-0.0869332
FAM168B	0.0304175	0.0903991	-0.0579408	0.0034735
RGL2	-0.0154198	-0.168221	0.287296	-0.209632
C21orf33	0.0417658	-0.229397	0.408354	-0.329509
TRIB1	0.302666	-0.0786606	-0.252426	0.17171
GBF1	0.0347748	0.244881	-0.308172	0.186038
LAMC1	-0.0778035	-0.143673	-0.306044	0.419068
STMN3	-0.121408	0.121739	-0.0107649	0.00351058
EFTUD2	-0.0633253	-0.145701	-0.275529	0.382352
PRDX4	0.047003	-0.0884104	0.0828403	-0.0628578
FAM162A	0.0476593	-0.0163209	0.197899	-0.217085
TNC	-0.0876239	-0.105591	0.0916378	-0.00689474
SLC37A4	-0.00941531	-0.28203	0.225296	-0.0929824
VAMP2	0.134979	0.0364384	0.16904	-0.249524
PPPDE1	-0.194536	0.0946767	-0.19837	0.241643
PIM3	0.121385	-0.152703	-0.0394116	0.0634073
ATP6V1B2	-0.028035	-0.157145	0.0556413	0.0301557
HSBP1	0.0302104	0.160892	0.0693832	-0.162316
ELOVL5	-0.150222	-0.170886	-0.0178917	0.164444
CALCOCO1	-0.323113	-0.226071	-0.079269	0.327555
WDR77	-0.102716	-0.0779311	-0.0470548	0.129685
AHSA1	0.278204	0.148724	-0.189475	0.0069756
SF3B1	-0.246598	-0.187619	0.404198	-0.223801
PXDN	0.0463005	0.0806843	0.0579504	-0.118506
AKT1	0.137781	-0.121425	0.268114	-0.276987
SNW1	-0.17018	-0.200123	0.226715	-0.0662411
PRG2	0.0293604	0.00659786	0.0391634	-0.0561128
CKS1B	-0.000613568	-0.158847	-0.320772	0.409098
KLF6	0.0971641	-0.0201929	-0.399218	0.382078
SGTA	0.321418	0.213974	-0.197995	-0.0339568
RAP1A	0.018685	-0.133437	-0.0877373	0.147432
ATG3	-0.0901502	0.136828	-0.0505133	0.0241886
PCNA	-0.0253013	-0.104252	-0.209495	0.277926
MPZL1	-0.123657	0.0850103	-0.160331	0.177046
TOMM22	-0.0734864	-0.213649	-0.0263276	0.161485
XPNPEP1	0.00920031	0.0597985	-0.0849171	0.0551347
PIGR	-0.105313	-0.23667	0.161574	-0.00849598
STAMBP	-0.174766	-0.162109	-0.0876379	0.242757
POR	0.280154	-0.0805667	-0.307212	0.238841
ZFP36L1	0.189293	0.0984321	-0.214801	0.094988
NDUFS6	-0.0510746	-0.287313	-0.0617489	0.224301
PDIA4	0.116634	-0.102219	-0.0345592	0.0359917
WDR34	0.162209	0.00751104	0.240239	-0.320737
API5	-0.0962577	-0.174351	-0.0722225	0.199609
NAT10	0.0713629	0.0864139	-0.091215	0.0225809
ZYX	0.090121	0.275784	-0.316902	0.156805
BAG1	0.0673616	0.11164	-0.045965	-0.0347672
IGF2R	-0.0682711	-0.176339	0.120763	-0.0110195
FSTL3	0.0300632	0.196149	-0.143373	0.040965
MTOR	0.140021	-0.267506	0.0108292	0.0590131
MVP	0.041724	0.263765	-0.077278	-0.065051
TMEM30A	0.0477629	-0.229867	-0.0945895	0.188862
SMS	0.130589	-0.148183	-0.197049	0.220536
SIGMAR1	0.0839164	-0.06653	0.0337609	-0.0381869
PDCD6IP	-0.266577	-0.183747	0.197679	-0.00344765
PRKACA	0.151951	0.240964	-0.0473292	-0.131517
CHMP7	0.175214	-0.00469741	0.108784	-0.184231
TRAF3IP2	-0.00746202	-0.216281	0.033382	0.0731013
PMEPA1	-0.0333252	0.173264	-0.154409	0.0901782
PAFAH1B1	-0.256018	-0.169375	0.456221	-0.282501
B4GALT1	0.27182	0.215226	-0.29273	0.0844266
BAHD1	0.160577	0.0102797	0.12825	-0.20545
RNF40	-0.0598206	-0.165774	0.0867088	0.0155661
LBH	0.012461	0.140215	-0.235144	0.170422
CIAPIN1	-0.020376	-0.079827	-0.11911	0.170476
MGST3	-0.0496129	-0.184482	-0.0442414	0.155869
NUDC	0.0253946	-0.332027	0.10912	0.0367708
MX1	-0.0807341	0.0363756	0.0909309	-0.0776709
MRFAP1L1	-6.06595e-06	-0.232304	0.183407	-0.0776136
CCDC28A	0.0723654	-0.209389	0.164531	-0.0996619
LMNB2	0.129244	0.16251	-0.341091	0.220086
SYVN1	0.200123	-0.0421641	-0.307486	0.254315
P4HB	-0.0504047	-0.33365	-0.00845877	0.191241
METAP2	-0.0674342	-0.192941	0.0282284	0.0924468
C5orf15	-0.0961317	-0.219154	-0.022709	0.169947
VPS25	0.10842	-0.0560597	-0.191294	0.17941
MED15	0.017431	0.262968	0.0561392	-0.192543
ALCAM	0.0246049	-0.026777	-0.0480129	0.0522697
SEC13	-0.151353	0.270088	0.246889	-0.322286
C15orf44	0.041895	0.0687105	0.179777	-0.236983
SETD2	0.161944	-0.177538	-0.0149397	0.0329707
ID1	0.173425	0.270463	-0.0829355	-0.117965
ADIPOR2	0.0723532	-0.195549	0.30536	-0.252139
UBE2Q2	-0.139265	0.0865526	-0.0479513	0.066541
PISD	0.00391145	-0.00130349	0.180117	-0.187486
PFKM	-0.00614105	-0.0678357	0.0482111	-0.0145408
MGP	0.0687913	-0.0675705	-0.348396	0.364322
ASNA1	0.0973868	0.0222513	-0.0805566	0.0315786
NDUFA8	-0.107327	-0.234197	0.0717193	0.0841807
GLUD1	-0.0511206	-0.293779	0.692931	-0.553839
VPS28	0.452021	0.0121684	-0.303859	0.118085
CITED2	-0.11049	-0.0695253	0.360977	-0.293515
HIBADH	0.158114	-0.132167	0.0406661	-0.0449045
PLXNB2	0.140487	-0.155045	0.0641425	-0.0507205
PRPF3	0.102018	-0.244976	0.30051	-0.235742
E2F4	-0.0162368	-0.093827	-0.0215317	0.0744774
PRKAB1	0.0298156	0.15124	0.0329885	-0.119807
EIF2S1	0.0809044	-0.108507	-0.147518	0.171037
RNASE1	-0.124905	0.0665016	-0.336919	0.369329
SEC61G	0.128461	0.029634	-0.225814	0.165285
CKAP5	-0.084173	-0.0315061	0.298237	-0.258033
LIMA1	-0.050659	-0.140312	0.0253842	0.0628854
MPDU1	-0.169597	-0.328185	0.239886	-0.0182395
TMEM167B	0.0457453	-0.0572316	0.00583817	0.00232251
CTNNBIP1	-0.103252	-0.105694	0.140993	-0.0513502
RAE1	0.126728	0.0993782	-0.103302	0.00548282
MGAT1	0.0284436	0.237087	-0.0638543	-0.0604561
ARHGAP1	-0.0422999	0.143115	-0.115839	0.0686016
RAB6A	0.106681	-0.0702393	0.0531954	-0.0661132
PES1	0.035293	0.103971	-0.0633853	0.00049569
PPP1R16A	-0.0586386	-0.0996784	-0.124722	0.202013
WASF2	-0.174003	-0.154491	-0.0787123	0.229514
TOP2B	-0.177061	-0.178357	-0.0253143	0.187056
TMED9	0.234702	0.206409	-0.0629718	-0.133519
RBM9	0.311261	0.341028	-0.0726328	-0.220852
ECE1	0.251863	0.262321	-0.169783	-0.0571964
RERE	-0.111968	0.347359	0.152185	-0.27819
RHEB	-0.162427	-0.0135642	-0.0484468	0.1252
AP2B1	-0.0100524	0.346074	-0.194877	0.0387518
LEPROTL1	-0.107495	-0.0531732	-0.109819	0.184713
UBE2A	-0.142303	-0.153433	-0.24581	0.388624
AK1	0.0418272	0.230454	-0.21236	0.0908468
KRTCAP2	-0.101181	-0.136126	-0.280109	0.398429
C14orf156	0.322174	-0.163924	-0.0694356	0.0152445
POLR2E	0.0913269	-0.0939457	0.105678	-0.102516
ENSA	0.0631556	-0.139465	-0.0513025	0.0938737
CBX5	0.018818	0.0971231	-0.00837446	-0.0461982
COL18A1	-0.0107142	-0.0521814	0.446629	-0.43264
FURIN	-0.00587312	-0.229704	0.191268	-0.0845342
PAPD7	-0.13114	-0.242362	0.31988	-0.158742
GLO1	0.00207277	-0.187199	-0.105919	0.199239
VAMP3	0.244056	0.165236	-0.142992	-0.0347258
RABAC1	0.168221	0.014323	0.0309289	-0.109875
ESYT1	-0.246517	-0.376259	0.076111	0.206975
BLOC1S1	0.347475	-0.190298	-0.110031	0.0593477
MRPL22	-0.0788372	-0.110725	0.120532	-0.0380323
HNRNPA0	0.0656336	-0.0345316	0.0543066	-0.0672102
G6PD	0.287514	0.294477	-0.112626	-0.146941
CARS	0.07579	-0.221531	0.123466	-0.0527265
FLOT2	0.149556	-0.129874	-0.0871102	0.0898767
CLPTM1	0.0497158	0.295006	-0.000343735	-0.163164
ITGAV	-0.212535	-0.0504573	-0.353686	0.480157
ACSL1	0.0348606	-0.292728	0.306663	-0.190719
SFRS6	-0.102253	-0.0512183	0.405221	-0.351638
ABHD14B	-0.0820448	0.0903106	0.272281	-0.290925
ATXN10	-0.246269	-0.070701	0.218941	-0.0886495
UQCR11	0.198878	0.17781	-0.0376047	-0.130854
CYBRD1	-0.133932	0.129652	0.0140025	-0.0206726
LSM3	0.211173	0.0572781	-0.207144	0.0977214
MRPS21	-0.0233695	-0.0683359	0.0267576	0.0151754
MRPL15	-0.142997	-0.0996335	0.0691688	0.0368368
CYTH2	-0.0411575	0.0435354	-0.161819	0.16384
MAP2K2	0.192728	0.31827	-0.217027	-0.0103878
IGBP1	-0.15791	-0.0904561	0.0335004	0.0756161
RPS3A	-0.1362	-0.216433	-0.0472952	0.210981
CARKD	0.104622	-0.185079	0.191215	-0.152636
PRKCDBP	0.219209	0.0646249	-0.282946	0.169257
ICMT	-0.0984469	-0.205796	0.267449	-0.135918
CLK1	0.319808	-0.184734	0.1165	-0.166191
GJA1	-0.0931092	0.119213	-0.066581	0.0505823
DNAJB6	0.00138735	0.340073	-0.229436	0.0726057
RPL28	0.0478971	0.190589	-0.0750101	-0.0346408
RBX1	-0.216311	-0.164184	0.00474232	0.165641
PRCC	0.059218	0.0499094	-0.378705	0.342967
INSIG1	0.0489038	-0.18309	-0.226707	0.302552
NDUFS4	-0.163539	-0.236763	0.0719469	0.108888
EFNA1	0.118034	-0.153425	-0.182799	0.213611
JUP	0.125683	-0.0536762	-0.250269	0.232032
ZCCHC3	0.0128597	-0.0434523	-0.158021	0.179166
BACE2	0.0086798	0.190947	-0.201588	0.112763
KIAA0494	-0.178203	0.162678	-0.151985	0.153875
TMEM214	-0.116382	-0.221631	0.0881236	0.0649436
HSPE1	0.310881	0.403594	-0.124526	-0.197203
TOMM34	0.0434302	0.268473	-0.204506	0.0636672
STARD3	0.161873	0.410332	-0.192388	-0.0673721
NDUFA11	0.0155441	-0.0989556	0.12145	-0.0844677
TMEM167A	-0.0421839	0.03784	-0.130328	0.134424
AHSG	-0.0957072	-0.285938	0.614871	-0.458015
PRC1	-0.122515	-0.0939145	-0.137771	0.239671
FAM96A	0.251055	-0.0653043	-0.105098	0.0344967
CNIH	0.0766295	-0.12185	-0.0805094	0.109917
FAF1	0.164709	-0.113113	-0.147835	0.138253
ASNS	-0.0132563	0.224897	-0.31976	0.227945
PRR13	-0.115186	-0.309643	0.120439	0.0735147
SUMO2	-0.0805525	-0.104564	-0.167663	0.258069
FAM89B	0.0361727	0.158301	-0.0946248	0.00621165
VPS26B	0.159027	0.258375	0.0831353	-0.277978
PTK2	0.00345401	-0.0240426	-0.229323	0.247568
PRKCZ	0.0947781	-0.0406455	0.299329	-0.330205
SERPINA5	0.0736838	-0.209649	0.556716	-0.506103
GRN	0.320258	0.0627203	-0.245606	0.088912
TOMM20	-0.130779	-0.066005	-0.341607	0.440691
BRP44	0.277521	0.158711	-0.19941	0.0127235
CCT3	0.0713578	0.142625	-0.289195	0.200379
CCL2	-0.0738434	0.287505	-0.237961	0.138556
TGFB1	0.0679439	0.035412	-0.100243	0.0580151
RAB11FIP5	0.133805	0.137624	-0.211675	0.0962109
BAZ1B	-0.0718447	-0.175067	-0.0790298	0.196708
BACE1	-0.202031	-0.179459	0.307332	-0.146256
ADH5	-0.152672	-0.282286	0.185593	0.00865143
GPR56	0.046696	0.128308	-0.186829	0.111722
C10orf26	0.0875662	0.0818211	-0.0554872	-0.0190194
AKR7A2	0.020349	-0.0733977	0.0773964	-0.0532373
MRPL1	0.0778214	0.0643307	-0.0936001	0.0329981
TP53INP2	-0.00572833	-0.237077	0.0434789	0.0719665
SELENBP1	0.278349	-0.180975	0.258181	-0.297202
EIF4EBP2	-0.111512	-0.202821	-0.0434212	0.189983
HTRA1	-0.0948381	-0.200145	0.0744625	0.0596191
LGALS9	-0.0796367	0.15648	0.0338328	-0.0770605
MET	0.0933406	-0.0176137	-0.150612	0.125074
PKDCC	0.0924243	0.0908149	-0.245216	0.171003
RPS4Y1	0.0903155	0.0605755	-0.165812	0.104302
ALDH18A1	-0.0502845	0.111566	-0.123799	0.0954554
MT1E	0.354335	0.236575	0.0929001	-0.359909
NDUFB8	-0.0835183	-0.118633	0.0165401	0.075421
C1QA	0.122416	0.466973	-0.0168884	-0.259791
UNG	0.139464	0.204186	-0.229998	0.080629
SPTBN1	0.145964	0.0793032	-0.0440433	-0.0542748
POMC	0.17187	0.254998	-0.082463	-0.110326
PMF1	0.0249914	-0.143441	-0.06719	0.128335
USP39	-0.137373	0.000454232	0.0847652	-0.0300464
SLC39A13	-0.0416328	0.438765	-0.10578	-0.08496
MNAT1	0.101178	-0.0231505	0.0419148	-0.0748694
SCD5	-0.0743168	-0.085059	0.023735	0.0478687
RAPGEF1	0.0893758	0.131131	-0.124542	0.0278783
RAD21	-0.116246	0.0544788	-0.231988	0.262858
TAF7	0.06079	-0.110624	0.0553234	-0.0294501
USO1	0.185564	-0.0230626	-0.0721173	0.00755675
POLR2L	-0.00892335	-0.0790836	-0.0803369	0.125147
RNF181	0.0180703	-0.104009	-0.0298249	0.073517
KEAP1	0.00663089	-0.143278	0.0405261	0.0244857
PRAF2	-0.0192141	0.284262	-0.0964309	-0.0294316
COMT	-0.107437	0.0527906	-0.0623872	0.0843796
NUDT9	0.00505007	-0.137897	0.109159	-0.0485004
DDX56	-0.00404144	-0.0629976	0.0732618	-0.0436979
RFTN1	-0.13537	-0.117363	0.105038	0.00505462
MYO1C	-0.0249862	-0.0685568	0.00326673	0.0402829
RHOBTB3	-0.166445	-0.114779	-0.163829	0.295254
MRPS35	-0.0994999	0.0678385	-0.0771736	0.0890689
TUBA4A	0.142212	0.315415	-0.411124	0.213232
COBRA1	-0.0182324	0.0746598	0.0208965	-0.050023
RFXANK	0.189243	0.361229	-0.118577	-0.131599
GBA2	0.124363	0.163755	-0.0201051	-0.110758
SIAE	0.0467521	-0.0483398	-0.00550838	0.00934775
NIF3L1	-0.014956	0.0859564	0.0449911	-0.0818073
ISCA1	-0.179939	-0.202373	0.0126497	0.160573
UQCRB	-0.0411517	-0.122397	-0.119221	0.199922
GNL2	-0.0259951	0.0397022	-0.134851	0.131381
RAF1	0.0487882	-0.1978	0.398843	-0.337893
PUM1	-0.204113	-0.1868	0.0805991	0.092896
STRAP	0.0322247	-0.142884	-0.151102	0.211886
LARP1	0.000401686	-0.192736	-0.220211	0.32094
F13A1	-0.0545767	-0.0135103	-0.301852	0.342035
SPINT1	0.00322099	0.171454	-0.013395	-0.0703428
GRINA	0.140111	0.258017	-0.3452	0.173607
UNC119B	-0.235414	-0.151226	0.419875	-0.262332
STK38	0.152083	-0.00111889	-0.0479941	-0.0139027
FCGBP	-0.0742553	0.0651471	0.180146	-0.186666
WDR59	-0.0837825	-0.258097	0.44925	-0.305038
PIGT	-0.130155	-0.0507631	-0.0161312	0.0961128
STATH	-0.0595855	0.0762953	-0.0460637	0.0359449
SERPINA3	0.471238	-0.0431113	-0.190829	0.0196806
SIVA1	0.284311	-0.185308	-0.0508418	0.0222948
MAP4	-0.14028	0.00390276	-0.197796	0.262035
CHMP4B	-0.158426	0.0443807	-0.215178	0.268122
ADRM1	0.162225	-0.145962	-0.183715	0.192318
PIR	-0.0391369	-0.22189	-0.139562	0.268208
CRMP1	-0.0452806	0.152181	-0.00233583	-0.0520269
CUL3	0.145648	0.460175	-0.329822	0.057663
AKR1A1	0.143738	-0.0777597	-0.041393	0.0198179
GTF2E2	-0.0716602	-0.0197571	-0.0754528	0.117877
SRRM2	-0.203059	-0.0337242	0.519296	-0.435681
MOCS2	-0.0260885	-0.0776095	-0.133466	0.186675
ADD1	0.0407708	-0.230076	-0.100111	0.197628
VPS37B	-0.026786	0.250679	0.0834739	-0.196257
SDR39U1	0.0767667	0.435668	0.0996514	-0.346063
C10orf10	0.00842499	0.127363	-0.410898	0.360285
S100A9	0.060551	0.177464	-0.0885658	-0.0196009
PFDN2	0.123414	0.0713845	-0.26828	0.191202
SPON2	0.0920177	0.391361	-0.115485	-0.108362
GSTK1	-0.0991447	-0.405178	0.150864	0.0814184
ELAVL1	0.133327	0.12246	-0.122982	0.0119204
EGFL6	0.00867349	0.0755427	-0.0546883	0.0164543
PPT1	-0.183953	-0.130284	0.0362782	0.102968
C1orf144	0.072385	0.00861112	-0.230644	0.204091
PRSS8	0.0456374	0.0400555	0.166124	-0.21058
TNNI1	-0.018102	-0.0569467	0.0910504	-0.0591087
PSMC1	-0.111654	-0.256071	0.183639	-0.0192903
DRAP1	0.0959236	0.276241	-0.327578	0.16519
TLR9	0.142731	0.273778	-0.128757	-0.059188
FGFR1	-0.146975	0.215383	0.0504929	-0.0943774
ISLR	-0.0495514	-0.0313438	-0.124063	0.164477
HES1	0.262028	-0.0120812	-0.164623	0.0657743
LRRC49	-0.117113	0.0424707	-0.0443828	0.0748075
RHBDD2	0.159873	-0.111324	-0.273026	0.269032
HLA-DMA	-0.109629	-0.0556616	-0.160255	0.239029
PSMG3	0.0424725	0.0215919	-0.152772	0.129814
TNS1	0.133641	-0.13929	0.0960171	-0.0884454
STRN4	0.0116306	0.248859	-0.48227	0.37411
AIMP2	-0.0463824	-0.0311741	-0.0185276	0.0538032
SDCCAG3	-0.0341454	-0.174678	0.0243767	0.0735718
BAT2L2	-0.0453052	0.0674208	-0.244312	0.239449
NOTCH3	-0.119193	-0.0286539	-0.409142	0.487672
RPA1	-0.0297475	-0.0305249	-0.0102524	0.0379081
KDM3A	-0.0667852	0.168373	-0.278165	0.23477
CCDC6	0.0946853	-0.112045	0.153634	-0.144832
SDC1	-0.1242	-0.241855	-0.0320305	0.202403
TMEM43	-0.0834612	-0.107626	0.0270431	0.0592049
C5orf32	-0.143496	-0.189526	-0.179407	0.337824
G3BP2	-0.174457	0.119009	-0.00816761	0.0245102
DYNLT1	0.086284	-0.163831	-0.0826614	0.12836
PDZD11	-0.0676143	-0.141752	-0.253816	0.359774
AXL	0.0466374	0.0889951	-0.236927	0.182609
TMEM165	0.00342308	-0.124831	-0.111029	0.173821
BTBD1	0.114171	-0.114858	-0.0553764	0.0646886
SLC44A1	-0.0691076	0.0677342	-0.208997	0.212774
SEC24B	-0.0533492	-0.171943	0.345233	-0.251819
CHMP1A	0.0619782	-0.0370917	-0.0850115	0.0797977
KBTBD2	-0.128618	0.0005325	-0.135449	0.194201
ADAM12	-0.0375679	-0.069248	-0.11611	0.169507
STOML2	-0.0266982	-0.19582	0.122029	-0.0204468
TCEB2	0.179547	0.267721	-0.0715928	-0.130965
PFDN5	0.200204	-0.0028754	-0.0948606	0.0151735
CRABP2	0.281655	0.165214	0.0642726	-0.265141
AP2S1	0.0376941	0.0918212	-0.151356	0.096426
ABCF3	0.272193	-0.0846724	0.0289395	-0.103819
RPLP2	0.209629	0.00799879	-0.26878	0.185995
TSPO	0.182597	0.164421	-0.119878	-0.0323453
REEP5	-0.0841428	-0.244089	0.0187539	0.134017
MRPL36	-0.150135	-0.18897	0.105713	0.0451846
SS18L2	-0.078986	-0.19216	-0.00886141	0.135338
TNPO1	-0.0950663	-0.111924	-0.00569129	0.100064
CDK2AP2	0.442895	-0.0725847	-0.246752	0.103769
XPO1	-0.114687	-0.101831	0.222244	-0.13251
ANAPC13	-0.0426769	-0.223441	-0.0620177	0.190173
KIF3B	-0.153135	0.0541287	-0.097446	0.139297
IER5	0.0312399	0.0715523	-0.411897	0.378668
ANGPTL4	0.29897	0.0572938	-0.198985	0.0522467
SERPINB2	-0.150174	-0.0368	0.0346063	0.0452809
FXR2	-0.0386827	0.0325583	0.10837	-0.111612
TMEM50A	-0.0552461	0.126779	-0.351952	0.326391
AARS	-0.0308177	0.0626442	0.104355	-0.125311
C15orf24	-0.137261	-0.094976	0.100882	-0.000663855
COL4A1	-0.126974	-0.102363	-0.342689	0.457776
DTYMK	0.00406919	0.188346	-0.0275194	-0.0642411
ERLEC1	-0.224985	-0.218787	-0.182546	0.389576
TTC19	0.0441175	-0.249008	0.42076	-0.333868
HM13	0.392245	-0.0789786	-0.387805	0.274242
DHX40	0.0724933	0.0793081	-0.0956217	0.0301001
UBE2Z	0.0606269	-0.118886	-0.0596819	0.0936703
EML4	-0.203306	-0.218458	0.0478103	0.141799
TRAF4	-0.151109	0.198587	-0.0747813	0.0451727
HNRNPH3	0.0937186	0.0575662	0.011483	-0.0792241
GRAMD4	-0.00725281	0.150242	-0.0548483	-0.0127615
KIAA0247	0.0860858	-0.111763	-0.14497	0.167788
GDF15	-0.0147652	0.0312298	-0.304411	0.306277
ID3	-0.0597389	-0.115046	-0.000529728	0.0813323
MTHFD1	-0.0709075	-0.185405	0.36618	-0.259596
RAB1B	0.211614	0.269344	-0.156709	-0.0571542
PIGY	-0.000785932	0.273634	0.0576398	-0.191568
ACIN1	-0.159179	-0.0771957	0.186974	-0.0891403
ZFP106	-0.187242	0.218307	0.145186	-0.176842
SLC39A9	0.00317149	0.0422527	0.111819	-0.137516
MYO1D	0.0724765	0.228269	-0.268211	0.136798
ABR	-0.0434366	0.174092	-0.271401	0.215158
GOLGA3	-0.0821338	-0.0745334	0.131472	-0.0654566
NPEPPS	0.0279322	-0.0400611	0.0289194	-0.0223583
TSPAN6	-0.204611	-0.154396	0.221671	-0.0685982
FABP4	-0.0713351	-0.0634641	-0.157743	0.224051
HBP1	-0.225486	-0.151146	0.00762174	0.160229
CMAS	-0.113832	-0.0629588	0.266213	-0.197174
SNAPIN	-0.239222	-0.143632	-0.00786158	0.178419
CCNDBP1	0.123756	0.0807559	-0.0148075	-0.0758786
SEMG1	-0.0208629	-0.0236425	-0.141489	0.166698
PRKACB	-0.158778	-0.0287414	0.227372	-0.154546
TRIM44	0.0620832	0.0234495	-0.209124	0.178986
ARL2BP	-0.0307667	0.0447245	-0.145217	0.141698
DDR1	-0.0709954	-0.134585	-0.0860866	0.184094
ADM	0.0286269	-0.0369732	-0.0622735	0.0702641
TCEAL8	-0.0198288	0.00487302	-0.0260952	0.0330215
ARHGAP17	0.0475742	0.163745	-0.112235	0.0170044
CTSB	-0.028564	-0.174609	0.00851527	0.0876054
NINJ1	-0.104756	0.11463	0.0281895	-0.0404037
GLA	-0.00364331	0.0783326	-0.462169	0.442145
AKT1S1	-0.00364847	-0.00739509	0.275548	-0.28015
PHF1	0.055785	0.25329	-0.173892	0.0341014
DPY19L1	0.0980485	-0.0295815	-0.10846	0.0852342
ADCY6	-0.117423	0.0986453	0.0813255	-0.0823468
PLK1	0.0783318	0.248752	0.0171128	-0.170951
TPM1	-0.103471	0.213481	-0.264326	0.214114
TMEM111	-0.0745446	-0.149961	-0.137777	0.246533
ERH	-0.15144	-0.248934	-0.0864159	0.273613
SPSB3	0.22583	0.355022	-0.029406	-0.236341
CRYBA4	0.252946	0.299006	-0.240832	-0.00182741
IRF1	-0.0795646	0.216186	0.048899	-0.12154
RNF185	0.147021	0.144169	0.110736	-0.246301
PRPF19	0.141434	-0.0098983	0.0629348	-0.120009
PDRG1	-0.06939	-0.00763823	-0.150532	0.18879
SEPX1	0.183223	-0.0648962	0.0754347	-0.123994
GRAMD1A	-0.134567	0.178171	-0.169906	0.146541
SLC6A8	0.0730107	0.0852539	-0.163165	0.0969333
TJP2	0.0480506	-0.200851	0.360511	-0.296424
FAM60A	0.172738	0.267015	-0.212734	0.0183651
AFF1	-0.0561645	-0.235045	0.195404	-0.0650281
CD99L2	0.207948	0.0713452	-0.17103	0.0548968
GNS	-0.0357934	0.00849214	-0.387057	0.411691
C18orf10	-0.188131	0.0493867	-0.199354	0.261846
RNF7	0.177319	-0.0648386	-0.0636863	0.022493
DHX30	0.201849	0.212181	-0.0165472	-0.170516
CASP4	-0.108483	0.131348	-0.0981942	0.0839286
PGC	-0.00430047	-0.0107371	-0.144382	0.156474
NELF	0.058411	0.0196421	0.117985	-0.156266
IQGAP1	-0.148524	0.131404	-0.113725	0.116864
UBQLN2	0.0921968	-0.170402	-0.196971	0.247381
CHERP	0.148539	0.113072	-0.160406	0.0487855
SIK1	0.128823	-0.0771686	-0.344944	0.340073
C11orf68	0.059469	0.253882	-0.143554	0.000855001
SORBS3	0.168199	-0.16719	0.0549458	-0.0470163
RAI14	0.00523881	-0.051866	0.159182	-0.141939
EPS8L2	0.130574	-0.0456939	0.029621	-0.0636438
EIF1AX	-0.0770884	-0.223318	0.211029	-0.0780476
CLDN4	-0.0727648	0.147112	-0.307756	0.278199
TBL1XR1	-0.257021	-0.278287	-0.110976	0.357744
TRAK2	0.0107935	0.0715684	-0.0316773	-0.00634128
B3GNT1	0.0749481	-0.0388475	-0.0283002	0.0164666
TARS	0.03979	-0.0138331	-0.100123	0.0935585
RCN1	-0.0120444	0.0858003	0.0548384	-0.0931541
CCNB2	-0.083517	-0.073993	-0.25264	0.332518
MYL6	0.321265	0.169297	-0.158927	-0.0527479
IFI16	-0.000456295	0.192632	-0.191608	0.10547
LBR	-0.0450257	-0.166838	-0.242535	0.350692
NDN	-0.0462679	-0.0409124	-0.0883184	0.130712
FADD	0.0255917	0.271206	-0.136256	-0.000786978
SETD5	-0.298054	-0.213549	-0.0954422	0.327681
SBF1	0.135879	0.23076	-0.111701	-0.0531676
PLEKHA2	-0.112119	0.262651	-0.04313	-0.0349933
CSNK2A2	-0.0185778	-0.230511	0.160229	-0.046654
ITPA	0.079792	0.225992	-0.210175	0.0747322
CDC16	0.0120979	-0.132142	-0.0643833	0.125407
SIN3B	0.134827	0.0215954	-0.0150984	-0.0516577
GATM	-0.00454424	-0.161877	0.302259	-0.232774
SLC2A1	-0.0509738	0.0361324	-0.0712367	0.0777819
ENOPH1	-0.000248973	0.373106	0.0453142	-0.227103
VSIG4	0.17081	-0.0107605	-0.0748962	0.0107105
CUL1	-0.0753142	-0.189827	-0.028479	0.152971
PRSS1	-0.0173615	-0.0171527	0.0702808	-0.0571488
ATPIF1	-0.125182	-0.209693	0.277943	-0.133625
BDH2	0.15966	-0.0257649	0.114239	-0.17314
FMOD	-0.0834656	0.320546	-0.26419	0.153801
RPS19BP1	-0.0357863	-0.105119	0.0165333	0.0487707
NPC2	-0.0910494	-0.150715	-0.16836	0.285518
ATG9A	0.114115	-0.2342	0.00954902	0.0551676
XPOT	-0.0625141	-0.0957471	-0.240282	0.321381
TM7SF3	0.0499229	0.244416	-0.12305	-0.0117723
BAT2	0.0692966	0.137598	-0.106587	0.0146327
DHRS3	-0.00523317	-0.259718	0.0336134	0.0929117
DULLARD	-0.142482	0.250232	0.163957	-0.230576
CDV3	-0.0503444	-0.035385	-0.204396	0.24993
RASD1	0.253498	0.250646	-0.219244	-0.00104021
UBE4A	-0.099517	-0.0406814	0.13295	-0.076015
CD53	-0.121126	0.479441	0.0463855	-0.228626
CASC4	0.0927848	0.0292193	-0.210375	0.164546
DNAJC13	-0.194787	-0.163922	-0.0460498	0.209021
STIM1	-0.130506	-0.014517	-0.232694	0.302943
MS4A6A	-0.0372423	0.617551	0.129493	-0.416773
SLC43A3	-0.0360248	-0.0203619	-0.123832	0.153228
PREX1	-0.127364	0.323808	-0.0475175	-0.0535751
HIATL1	-0.140599	-0.0132329	0.0323923	0.0321469
IMPAD1	-0.0755599	-0.160259	-0.212274	0.329061
COPG	-0.0101578	-0.149204	-0.104181	0.184236
B4GALT3	-0.0450937	0.127316	0.0209871	-0.0642352
SUPT7L	-0.194621	-0.0150464	0.179295	-0.0962786
MRPL51	-0.0145027	-0.231733	-0.149225	0.272581
ETFA	-0.0592192	-0.212055	0.112634	0.0108383
PIAS3	-0.0548907	0.071119	-0.298472	0.297773
TMEM184B	-0.209924	-0.0500814	-0.132084	0.24946
NISCH	0.228251	0.17492	0.0904626	-0.274425
SLC1A5	-0.0148149	0.403998	-0.0940658	-0.0915955
FEM1A	-0.0617734	0.0813709	0.0340953	-0.04857
UTP18	-0.116562	-0.130358	-0.197508	0.316615
PHC2	-0.0126633	0.062192	-0.0761346	0.0541052
GAA	0.0184574	0.0323227	0.0974608	-0.124299
ADCY3	0.0920149	-0.0277385	-0.148906	0.128759
WDR46	0.0829842	0.220472	0.105292	-0.250535
C14orf142	-0.111671	-0.131774	-0.18861	0.306025
TSTA3	0.0149669	0.176057	-0.14766	0.0614779
B4GALT5	0.146095	0.0530361	-0.197758	0.117496
MAD2L1BP	0.070073	0.0133169	0.0596962	-0.0977837
ZZEF1	0.318494	0.0971291	-0.0312898	-0.148843
RAP1B	-0.260531	-0.182533	0.0352197	0.161603
BANF1	0.255101	-0.195849	-0.0971459	0.0876416
VPS45	-0.0800726	-0.194753	-0.0740797	0.204566
EPCAM	-0.0808223	0.109607	-0.0594023	0.0426116
HEXA	0.0189008	-0.0418911	-0.321688	0.345301
C9orf123	0.317615	0.0016468	0.209835	-0.351958
TOX4	0.00576258	0.178533	-0.171076	0.0884047
ISG15	0.333239	0.205954	-0.0870539	-0.149918
PPIE	-0.0233242	-0.00114157	0.0801384	-0.0725766
ARL3	0.111235	0.124781	0.0188464	-0.126713
TGOLN2	-0.193848	-0.202784	0.244009	-0.0728793
CDH1	0.0782722	0.20256	0.150873	-0.28708
C1orf128	0.0288227	-0.0786018	-0.0158139	0.0422005
RNASET2	0.0161523	0.426207	0.0333298	-0.247272
NR2F6	-0.106272	-0.269833	0.144986	0.0251067
MTUS1	0.326599	-0.12572	-0.0843615	0.0103697
PGAP3	0.117954	0.125989	-0.125784	0.0195981
DDAH1	0.00651155	-0.272784	0.207328	-0.0855648
NAGK	0.062557	-0.135597	0.185532	-0.152927
PDIA5	0.396821	-0.176607	0.0980998	-0.183545
PLVAP	-0.0803108	-0.0778081	-0.464215	0.552044
CLEC11A	-0.0132077	0.372935	0.0376701	-0.213642
PURB	-0.157549	-0.0857179	-0.030747	0.139686
EXOC3	-0.0236963	0.0235115	-0.00415613	0.00293325
TBC1D5	-0.153313	0.103294	-0.220357	0.242857
DGCR2	-0.107317	-0.0934996	0.242018	-0.160115
CCDC80	0.0936811	0.318339	-0.464635	0.28768
SOD1	0.145757	-0.211401	0.0697875	-0.0315539
UNC45A	0.100807	0.219309	-0.0186137	-0.129214
NUPR1	-0.0130986	-0.154313	0.0481293	0.0302662
SEC61B	-0.0679357	-0.355623	0.0237546	0.175902
HMOX1	0.216008	0.144368	0.038352	-0.200552
TRIB2	0.175307	0.178338	-0.0103351	-0.149401
ADPRHL2	0.0403501	-0.181163	0.0892117	-0.0218277
EXOSC5	0.197767	0.0268171	-0.227574	0.139245
YIPF3	-0.00664097	-0.196871	-0.152512	0.255823
TWF1	-0.0864503	-0.0821691	-0.147598	0.228961
TM9SF3	-0.0977639	-0.209413	-0.0833563	0.228714
SRXN1	-0.0984837	-0.0766284	-0.322168	0.412082
NANS	-0.0164793	-0.0972466	0.206471	-0.159809
TMEM126A	-0.225415	-0.187341	0.531898	-0.365068
CTDSP2	0.0877825	-0.121241	-0.0436471	0.0667578
AAAS	0.0273208	-0.00828891	0.255782	-0.272314
POMGNT1	-0.0388336	-0.126186	-0.0798866	0.160055
FAM3A	-0.0034046	0.0778469	0.14942	-0.190869
PPM1F	-0.138184	-0.123134	0.00208781	0.115609
ATN1	-0.220941	0.240249	-0.0212322	-0.000950083
NRP2	-0.0677566	0.0823786	0.227868	-0.247138
MRAS	-0.0370351	0.280448	-0.143442	0.0285945
NSF	-0.0668094	-0.259529	-0.195902	0.356392
PDK4	-0.0988967	-0.14981	0.299407	-0.195867
GLRX3	-0.143591	0.0319197	-0.150739	0.201176
NSFL1C	-0.193879	-0.235601	0.177711	0.0116271
SLC35A4	-0.0598058	-0.185407	0.00151362	0.113246
C17orf37	0.0414308	-0.115381	-0.17839	0.222964
C3orf26	0.142868	0.00150255	-0.173425	0.118569
CDC34	0.0988873	0.156153	0.101847	-0.222593
PNKD	0.0908985	0.0340454	0.256572	-0.320398
GTF2B	0.123841	-0.102652	-0.161898	0.16499
HMGCS1	-0.0484877	-0.140151	0.0409247	0.0458037
PNRC2	0.0789966	-0.0712463	0.0266566	-0.0264786
KIAA0317	-0.0938969	0.0363698	-0.278274	0.310102
CIC	0.0454307	0.072549	0.106156	-0.164113
CSF1R	-0.0953743	0.0369379	0.328703	-0.317923
WSB2	-0.177694	-0.232533	-0.0101829	0.197837
TSPAN4	0.0309695	-0.17566	0.298781	-0.237488
RHBDD3	0.311241	0.271442	-0.176251	-0.079946
RASA1	-0.228331	0.118318	-0.00194	0.0411143
C22orf13	-0.0948405	-0.272877	0.388311	-0.230146
YTHDC1	-0.116741	-0.175258	0.225947	-0.0999953
POLDIP3	-0.11515	-0.0106062	0.0963661	-0.0460824
BNIP3L	-0.165902	0.348443	0.108716	-0.210971
MCFD2	-0.0908323	-0.277407	0.00800905	0.164062
ATP6V1E1	-0.113804	-0.0886164	-0.229901	0.328816
VAMP8	-0.113392	-0.0730456	0.118488	-0.0395529
SNRPF	0.0213444	0.145081	-0.0382362	-0.0395235
CLDN7	-0.00945137	0.0636478	-0.161815	0.140748
ROBLD3	0.246838	0.149105	-0.0649752	-0.108871
OCIAD2	-0.0457999	-0.158012	0.411429	-0.330264
ATP1A1	0.0921743	0.188334	-0.383735	0.267386
TMEM222	-0.0268208	0.242683	0.13877	-0.249624
SDF2	-0.0626515	-0.0316595	-0.1356	0.182098
MRPL23	0.0747479	0.216139	0.20808	-0.351379
GLYR1	0.030237	-0.116795	-0.202652	0.253484
BAP1	0.065608	0.0632752	-0.00541352	-0.0526372
PACS1	-0.103119	0.21151	-0.31695	0.269398
KIAA0141	-0.066643	0.0734825	0.126286	-0.138145
HDAC5	0.0880351	0.0349243	0.0631648	-0.11939
RNF13	0.230281	0.118149	-0.293547	0.149699
GADD45A	0.0183984	-0.0967704	0.100527	-0.0650666
MTMR4	0.063055	-0.151271	0.368972	-0.335469
C20orf11	0.128199	-0.172773	0.111367	-0.0858622
TCERG1	-0.0794398	0.0591327	-0.00121295	0.00617858
C2	0.146152	-0.133372	0.0149311	-0.0126366
C11orf95	-0.0395652	-0.183294	0.301926	-0.207313
CLDND1	-0.0816061	0.0181922	0.110375	-0.0886463
DES	0.0612311	0.0859524	0.082679	-0.152948
SSR1	-0.139506	-0.206977	-0.156941	0.321316
CORO1C	0.0342485	0.0782909	-0.359115	0.3195
RPL5	0.0280321	-0.0290497	-0.122051	0.128571
CECR5	0.0471749	0.0117131	0.170411	-0.201971
DECR1	-0.0183565	-0.246343	0.126935	-0.00462911
PPP1R1B	-0.0367959	0.0561317	-0.202658	0.198193
AP1M2	0.0906354	0.182062	-0.217476	0.0989458
SMARCD2	-0.020232	0.0430924	0.144	-0.161369
PGCP	-0.0822839	-0.188162	-0.251752	0.38625
GREM1	-0.173184	-0.0211395	-0.25382	0.34601
DIP2B	-0.102973	-0.0663802	-0.0216863	0.0979486
KTN1	-0.0901419	-0.103097	-0.00521329	0.093227
AEBP1	-0.139118	0.0754046	-0.173628	0.201973
LZTS2	0.0901169	0.146066	-0.105223	0.000348974
ZFAND6	-0.135088	-0.256385	0.0887398	0.0889877
VPS52	0.000621331	-0.121191	-0.131518	0.194456
TSPAN9	-0.16714	-0.361611	0.456733	-0.227613
PRPS1	0.0419876	-0.25312	0.069432	0.0327306
RBM39	0.220077	0.142738	0.0158069	-0.17814
HIST2H2BE	-0.00615965	-0.0511	-0.105545	0.136556
CDKN1B	-0.0915035	-0.0402427	-0.0107644	0.0691749
EIF4G2	-0.140848	-0.185782	0.0660416	0.0807977
TCTA	-0.208223	-0.195143	0.216928	-0.0424748
COX6A1	-0.191214	-0.293816	0.150982	0.0663063
HSPH1	-0.125261	0.0420445	-0.0947734	0.130616
NAA20	-0.0426685	-0.15693	-0.000938926	0.0947973
RPA2	0.199404	0.106593	-0.0464403	-0.0875147
HIST1H2BK	-0.0385461	-0.124514	-0.287543	0.374102
SLC38A1	-0.0187787	0.18733	-0.273699	0.200742
GRHPR	0.162416	-0.18497	0.283623	-0.272725
PSMB5	0.0876139	0.053269	-0.0840246	0.0243011
PDLIM5	-0.151588	-0.180344	0.0199506	0.130414
PCM1	0.292086	0.115906	-0.0820297	-0.0942523
REPIN1	0.228462	0.108932	-0.238233	0.097656
ETHE1	0.125398	-0.00240328	-0.138023	0.0911727
SUPT16H	-0.00728616	-0.0740541	-0.0870525	0.128979
CERK	-0.0897961	0.0667422	0.252463	-0.25575
P4HA2	-0.0404501	0.163259	-0.271676	0.219418
C6orf106	-0.0736013	-0.14349	0.00994609	0.0900776
PPP1R12B	-0.19295	0.0230266	-0.0202127	0.0911599
SH3PXD2A	-0.0853403	-0.132323	0.447397	-0.36324
ANPEP	0.106283	-0.0704117	0.427696	-0.453564
CLN6	-0.0111301	-0.0035901	0.0444424	-0.039581
SAR1A	-0.134137	-0.217564	0.0290164	0.131656
AHNAK2	-0.0592276	0.112751	-0.263561	0.243342
MAFG	0.120423	0.0498328	-0.090789	0.0191296
PCSK1N	0.127733	0.261027	-0.15154	-0.0231159
CDC42EP4	-0.0583232	0.0948063	0.0809965	-0.105072
HARS	-0.127595	-0.195538	0.0978121	0.0470331
COG4	-0.130784	0.0415973	-0.208469	0.250866
LANCL1	-0.143858	-0.162438	-0.0172127	0.156975
PTPN1	-0.105453	-0.129813	0.25199	-0.153677
C11orf31	-0.088138	-0.248364	0.00948384	0.147364
C16orf57	0.101757	-0.072284	-0.164034	0.161839
C20orf3	0.285459	0.148954	-0.29236	0.110317
PLAU	-0.0471395	0.13973	-0.305565	0.268692
ACP1	-0.24923	-0.250251	0.2599	-0.0430399
ZNF593	0.342632	0.159159	-0.21853	0.00484464
NDUFB3	0.293113	0.0664699	-0.0200867	-0.134923
CLTA	-0.0178168	0.153873	-0.24423	0.185996
RRAS	0.063242	0.175089	-0.0582318	-0.050991
SLC29A1	-0.0880433	-0.247228	0.196954	-0.0473036
CDC20	-0.125037	-0.0900456	0.0615943	0.032472
RANGAP1	0.0822377	0.0937307	-0.158531	0.0841491
KDM2A	0.159996	-0.0585708	0.0725899	-0.114312
PER1	0.287801	0.0950478	-0.0425062	-0.123283
TRPC4AP	0.090768	0.136148	-0.115018	0.0150079
BCL2L2	-0.196203	0.194567	0.241358	-0.261154
RNF31	0.114832	0.05517	0.11429	-0.193401
ABL1	0.0994098	0.245233	-0.309074	0.159547
SNX27	-0.096381	-0.104236	-0.246869	0.346583
STAT5A	0.0680091	0.0953807	0.0844472	-0.162193
EDC4	-0.0247089	-0.113608	-0.0142398	0.0800596
OCRL	-0.195609	-0.107719	0.165728	-0.0370338
PDS5A	-0.135121	-0.199796	0.281431	-0.137827
GTPBP2	-0.263214	-0.139237	-0.179976	0.364594
MEF2D	0.222307	0.337449	-0.317423	0.0718061
DNAJA1	-0.085985	-0.215803	0.0649665	0.0732833
TXNIP	-0.0401049	-0.0712027	-0.00723922	0.0588128
TNNC2	-0.0287753	-0.0613209	0.139037	-0.102173
OST4	-0.0201914	-0.193282	0.00752837	0.0941201
RAB5B	0.0355565	0.0334702	-0.110262	0.0829815
MEST	-0.0814545	-0.0669802	0.0611997	0.00335684
SCFD1	-0.0176874	-0.0326048	-0.153268	0.181885
MRPL14	0.0277561	0.0190177	0.0125367	-0.0338725
POLR1D	0.0147654	-0.137274	-0.0629166	0.125243
DPM2	0.0863326	0.0413804	-0.0896217	0.0363808
DNTTIP1	0.0877016	0.16076	-0.226587	0.119909
NDUFA4L2	0.066976	0.0713984	-0.0424748	-0.0187716
SEL1L	0.0914378	0.0448405	-0.0355878	-0.0233827
RSAD1	0.17267	-0.178662	0.0442561	-0.0322913
GOLGA2	-0.108087	-0.0658646	0.25753	-0.189203
RXRB	0.0302239	0.306018	-0.0285293	-0.131087
NEO1	-0.0814574	-0.0211851	0.086668	-0.0451376
NSMAF	-0.247422	0.0341723	-0.0622163	0.152227
ATP9A	0.0476516	0.154088	0.0634148	-0.160204
STK10	-0.0006821	-0.0230999	-0.0247811	0.0371049
NFIB	-0.0179778	-0.107005	-0.0530308	0.114189
PPP3CB	-0.227582	-0.123895	0.198213	-0.0493662
EXTL3	0.149742	0.314216	-0.193007	-0.0151697
CBFA2T2	-0.0947417	0.168079	0.235586	-0.285162
CDR2	-0.070434	-0.0629694	-0.0972935	0.160852
EP400	-0.120901	-0.135926	0.16415	-0.0532723
PNLIPRP2	0.363893	0.316377	-0.0674051	-0.236545
MKLN1	0.228698	-0.109407	-0.13235	0.0934489
RPS7	-0.0952918	-0.0794137	-0.105952	0.188244
AMD1	-0.141969	-0.0622072	-0.141031	0.235928
RBBP4	-0.21613	-0.180665	-0.101345	0.283357
MAEA	0.175519	-0.196379	0.129924	-0.11362
YTHDF2	0.0410381	-0.143503	-0.0536115	0.107542
LSM4	-0.14594	0.260131	-0.0865373	0.0254235
EIF1B	0.157053	0.0792424	0.0175926	-0.12273
TMEM66	0.0923955	-0.137588	-0.0154396	0.0435101
MRPL20	-0.19668	-0.334902	0.256886	-0.0211723
NAE1	-0.122608	-0.227559	-0.0724948	0.236714
NDUFB11	0.137725	0.265516	-0.1748	-0.00541849
PRM1	0.179405	0.251216	-0.338545	0.153434
HSPA4	-0.106853	-0.231512	-0.316274	0.484354
PIM1	-0.00335212	0.0676228	-0.110139	0.082758
STX5	0.245858	0.039899	-0.147044	0.0292761
AMFR	0.0965017	0.0231454	-0.318365	0.277712
C7orf50	-0.126541	0.120178	-0.0919296	0.0904556
ATPAF1	-0.178524	-0.116925	0.128019	-0.000751816
CAMK2G	0.239249	-0.0502964	-0.0673922	-0.00681222
FPGS	0.284265	-0.132729	0.148055	-0.209002
SNAPC2	0.163672	0.336761	-0.133304	-0.0937456
PRAME	-0.0984769	0.0286491	-0.159767	0.19308
COL5A1	-0.141425	0.0220103	-0.311664	0.37165
MAPK14	-0.158017	-0.306354	0.0184068	0.195615
THRAP3	-0.0574241	0.0710436	0.0945155	-0.107964
URM1	0.257577	0.0769461	0.0322054	-0.179137
ASAP1	-0.13114	-0.180345	-0.116575	0.263131
WASL	-0.0547556	-0.0527029	-0.088354	0.140025
HLTF	0.0924294	0.185208	-0.0942862	-0.030863
POGZ	-0.272945	-0.0694406	0.299001	-0.160892
PI4KA	-0.058588	-0.238942	0.0307051	0.108382
YTHDF3	-0.175822	-0.166731	-0.07132	0.228543
SQSTM1	-0.00642118	-0.173484	-0.239247	0.334221
MAP2K1	0.050421	-0.156628	0.477397	-0.4398
JAM3	0.108212	0.00806519	0.194481	-0.250864
SFRS7	0.151082	0.0678008	-0.0113132	-0.0847587
APOD	-0.0760412	-0.0632594	-0.216838	0.287115
LRPPRC	-0.0169702	-0.165549	-0.0807522	0.170753
HLA-DPB1	-0.0581536	-0.10934	0.172317	-0.101033
TACSTD2	-0.00284588	0.00170891	0.0707704	-0.072891
PDAP1	-0.165333	0.172315	-0.216107	0.210173
C10orf116	-0.0492033	-0.0373682	0.26129	-0.231696
IARS2	-0.148366	-0.0140215	-0.0654409	0.137085
WDR75	0.0442039	0.0808003	-0.120589	0.0671554
GNL3	0.0730516	-0.0821811	-0.0746378	0.0861774
FBXO7	-0.0729928	-0.281996	-0.134155	0.305932
IKBKAP	-0.0350211	0.167806	0.134009	-0.205055
HAUS1	0.159397	-0.0927936	-0.0204632	-0.00118784
DTD1	-0.114004	0.100657	-0.280339	0.289654
AGPAT6	0.038912	-0.21054	-0.0920288	0.180604
SEC24D	0.121449	-0.185992	-0.0506881	0.09114
OAF	0.201748	-0.233011	0.210916	-0.190824
UPF1	0.0128421	0.147746	-0.109053	0.0360865
EZH1	0.29793	-0.0845321	-0.067886	-0.0145011
NUDT16L1	0.173795	0.242192	0.0407319	-0.232487
KLF9	-0.0852898	-0.125196	-0.231099	0.335708
BMS1	0.362165	0.090209	-0.112194	-0.0801571
PTPLB	-0.0282225	-0.197014	-0.0844622	0.194544
HMGXB3	0.0376918	-0.0585878	-0.048402	0.0625262
TRIM27	0.00292298	-0.186845	-0.0552955	0.146302
RBM6	0.410416	-0.0126105	-0.0562071	-0.108779
ITGB2	0.00869066	0.276328	-0.128885	-0.00376617
CUX1	-0.00665898	0.305817	-0.000960548	-0.143978
SORD	0.0988144	-0.213865	0.320396	-0.270011
PTGFRN	-0.0948675	-0.160699	-0.314542	0.443287
SUPT4H1	-0.155549	-0.168284	-0.0412885	0.189655
FOSB	0.274252	0.210833	-0.276158	0.0683678
ADD3	-0.15524	0.0994909	0.127148	-0.114247
RBP1	0.169342	0.247736	-0.0367084	-0.153118
NCAPH2	0.0449925	0.116366	-0.0901298	0.0181033
RPRD1A	0.124847	-0.0168859	-0.265926	0.230816
EAPP	-0.215295	-0.0662046	-0.061831	0.186787
PCBD1	0.329746	-0.22743	0.152714	-0.187241
FEZ1	0.142915	0.150016	-0.180031	0.0536213
RTF1	-0.0762456	-0.042434	-0.0548033	0.109391
GCN1L1	-0.106822	-0.121331	-0.0570394	0.162725
GPC1	0.0627776	0.0107154	0.21282	-0.251972
C9orf69	-0.0178968	0.00432688	0.0234162	-0.0187859
BCL2L12	-0.107746	0.00364014	-0.0977841	0.144906
SNTA1	0.274685	0.111663	-0.0610475	-0.106587
ZC3HAV1	-0.127066	-0.048575	0.108718	-0.0354972
ARSD	0.271264	0.0619979	0.216318	-0.368287
CHD1L	-0.143706	-0.236248	0.232259	-0.0656874
DNAJC3	0.133121	-0.123904	-0.181761	0.19191
SLC25A25	0.431606	-0.0486866	0.0121505	-0.171048
SRPRB	-0.156417	-0.196282	-0.116134	0.281034
PUF60	0.319703	-0.0238053	-0.178412	0.0613951
C16orf63	0.134688	0.256669	-0.0028221	-0.177903
RNF34	0.093878	-0.0108691	-0.080373	0.0488729
MT1G	0.279173	0.0752166	0.401905	-0.570139
Septin 11	-0.0575618	-0.115592	-0.140313	0.22539
LSM2	0.0152511	0.0489558	-0.227738	0.205678
C3orf37	-0.0453492	-0.00763774	0.115034	-0.096276
FN3KRP	0.0259363	-0.0956115	0.0384719	-0.00456234
ARIH2	-0.199187	-0.0683951	0.19013	-0.0797904
CHTF8	-0.10121	-0.218623	0.168558	-0.0261774
DDB2	0.0498719	-0.187472	0.391254	-0.335484
ZNF212	0.0668585	0.0668254	0.077319	-0.140529
TIPARP	-0.104402	-0.0398545	-0.0870918	0.153444
FAH	-0.020869	-0.302693	0.532258	-0.395951
ARF6	0.0765056	-0.227173	-0.151082	0.233924
SCAMP3	0.098995	-0.0146742	0.0228107	-0.0582673
TDP2	-0.0963474	-0.170291	-0.00467333	0.127755
FAM120AOS	-0.0480365	0.0237846	-0.0172525	0.0266229
C9orf23	0.146418	-0.226786	0.12185	-0.0782956
SH2B3	-0.124341	0.0932459	0.197667	-0.197264
ANO6	-0.0335963	-0.181895	-0.148551	0.255852
WIPI1	-0.0830032	0.202149	-0.0149827	-0.0471733
MLST8	0.0607749	-0.104841	0.0512771	-0.0280496
RHOU	0.0517841	0.187895	-0.232909	0.128487
DNAL1	0.210455	0.281704	-0.107915	-0.113152
SLC35A2	-0.0647547	0.0156347	-0.115908	0.139744
RBM8A	-0.206551	-0.17621	-0.00795313	0.18048
VPS24	-0.219147	-0.103829	0.0738314	0.0661474
GNB1	-0.0655957	-0.220515	-0.00845639	0.142974
PRDX5	-0.0893627	-0.227842	0.0961584	0.0482339
COX7A1	0.0652671	0.203532	-0.161329	0.0411417
SNRPD3	-0.109406	-0.224282	-0.0521418	0.208493
ECHDC1	-0.116585	-0.133956	0.377756	-0.27718
CDCA7L	-0.126947	-0.17335	-0.00759848	0.145165
TOP1	-0.0163615	0.22894	-0.32901	0.236877
EPS8	-0.0749293	-0.0229136	-0.0783075	0.123736
ARFGAP3	0.036636	0.0224126	-0.159402	0.138742
JAGN1	-0.0908816	-0.0807706	0.085256	-0.0109084
BYSL	0.00642243	-0.0530334	-0.198301	0.228211
DHPS	0.152346	0.206519	-0.259176	0.104276
DSTN	0.0249604	-0.202318	-0.204026	0.29846
MRPS2	0.177968	0.0243558	0.0980141	-0.188283
ASCC2	0.0495702	-0.0879738	0.0242688	-0.00351515
NEK7	-0.118964	-0.242023	-0.21356	0.388206
SPOCK2	-0.124767	0.255656	-0.257831	0.19599
NLGN2	0.0755056	0.265495	-0.0392631	-0.119487
MRPL39	-0.153924	-0.127974	0.08489	0.038864
CHPF2	0.213573	0.131359	-0.157409	0.00942357
NSUN2	0.0890915	-0.162012	0.229318	-0.19668
LXN	-0.0601024	0.0818222	-0.0885655	0.0774922
NFAT5	0.0981974	-0.0966034	0.152463	-0.152563
TTC38	-0.0106939	-0.30135	0.227348	-0.0852318
EPT1	-0.0455879	0.0980771	-0.179062	0.157204
PRKCA	-0.0778245	-0.276697	0.0673022	0.0968503
IGFBP1	0.12654	-0.0122341	-0.518729	0.489569
CHGB	0.0987866	0.226076	-0.115055	-0.0317917
LAMP2	0.0224842	0.109048	-0.0816927	0.0223966
FKBP10	-0.154629	-0.00505801	-0.121504	0.193435
PDHA1	-0.148621	-0.240301	0.246044	-0.0759271
C19orf10	0.10302	-0.149028	-0.17756	0.212394
HARS2	0.152329	0.0686041	-0.105576	0.0119137
CORO1B	0.251408	0.292618	-0.141918	-0.100493
Septin 5	0.0850342	0.138526	-0.201978	0.106302
TDRD3	-0.0681062	0.184042	0.0183179	-0.0791801
DYNLRB1	-0.189516	-0.181953	-0.249827	0.426473
SSNA1	-0.0962723	0.03086	0.0832392	-0.0604907
TMEM129	0.139782	0.211937	-0.127889	-0.0289589
IMPA2	0.269695	-0.0408544	-0.194136	0.106999
SLC25A36	-0.0966127	-0.104378	0.0677663	0.0210221
CTSF	0.105343	0.096137	-0.0657921	-0.0227652
HAGH	-0.0592501	-0.250215	0.39228	-0.260213
NUB1	0.175975	0.00966426	-0.0194722	-0.058715
CANT1	-0.123826	-0.210036	0.110265	0.0395578
TRAM2	0.326458	-0.0114581	-0.0927534	-0.0360982
IRF4	-0.00226279	0.156132	-0.130028	0.0601183
EXOSC10	0.254093	-0.0621732	-0.117664	0.0447117
CIRH1A	-0.00850023	-0.108679	-0.0114135	0.0679173
Septin 8	-0.121484	-0.152978	-0.118613	0.247944
ANXA1	-0.0843111	0.23833	-0.288016	0.218552
HSD17B10	0.234879	0.0386992	0.241772	-0.368038
EFHD1	-0.0480649	-0.132149	0.185704	-0.108125
REXO2	-0.141547	-0.294335	-0.0844814	0.289377
OCIAD1	-0.0578674	-0.134619	0.068581	0.0184544
PDXDC1	0.120511	-0.167691	0.200117	-0.176955
TMEM50B	-0.0439799	0.136852	0.0247839	-0.0732433
RDX	-0.147767	-0.365337	0.252912	-0.0229762
SLC25A20	-0.0530166	0.00402867	0.168741	-0.154281
UBA2	-0.10443	0.0143098	-0.0318779	0.070122
MAN2A2	-0.0495062	0.0837399	0.401183	-0.434915
C19orf6	0.305389	0.28935	-0.0782367	-0.187602
VEGFB	-0.235801	0.133795	0.334913	-0.311943
RYBP	-0.142604	-0.214412	-0.208305	0.379391
WRNIP1	-0.00292643	0.384823	-0.185853	0.00768063
NFKB1	-0.0498861	0.0775319	-0.103879	0.0911108
MAPK3	0.0326692	0.173459	-0.0750853	-0.019864
POLR2A	-0.0858032	-0.0431551	0.269728	-0.222202
MRPS5	0.0963174	0.163812	-0.0385919	-0.079821
MPRIP	-0.0966317	-0.164255	0.346913	-0.239022
INTS12	-0.067524	-0.103206	0.0933471	-0.0182924
BTBD10	0.231879	0.119719	0.02257	-0.178995
LOXL1	-0.010017	0.137626	-0.278768	0.226314
FNBP1L	-0.102714	-0.0976556	-0.0652564	0.158059
DERL2	0.319373	-0.0649775	-0.142158	0.043898
SETD7	-0.154054	-0.239463	0.0184786	0.161546
ABLIM1	-0.0304296	-0.233187	0.130785	-0.00988157
SLCO2A1	-0.15316	0.0652364	-0.27362	0.316324
DTX3L	-0.179924	-0.185816	-0.0321532	0.198947
EMP1	-0.0603227	0.0878457	-0.0643789	0.0496351
NQO1	-0.0260077	-0.0715229	-0.334589	0.391913
HTN1	0.241306	0.0831672	-0.02729	-0.113689
MYH7	0.11169	-0.0953756	0.0516651	-0.0544944
CPSF3	-0.0275619	-0.190654	-0.0870457	0.193866
NECAP1	-0.202352	-0.134286	-0.0850825	0.238299
PFN1	0.122524	-0.100174	-0.105432	0.105891
PPP1R3C	-0.0317421	-0.235489	0.556335	-0.448767
SFN	-0.0485151	-0.0441275	-0.230334	0.280235
VPS26A	-0.222843	-0.184231	-0.0149254	0.198444
CD52	-0.0173479	0.0943669	-0.371198	0.345997
C13orf15	0.043988	0.187185	-0.443357	0.349984
VAPB	-0.214791	-0.195452	0.168194	0.0108964
PSMD10	-0.245726	-0.204688	-0.192479	0.401792
SCAP	0.108578	0.0648157	0.234554	-0.319927
GC	0.26239	-0.185883	0.255062	-0.284872
CLPP	0.0267048	0.213935	-0.0708289	-0.0413149
EXOSC8	-0.15466	-0.100079	0.432972	-0.334658
CNOT1	-0.133649	-0.0984188	0.322112	-0.229552
CENPB	0.225477	0.303445	-0.217989	-0.0160372
ELF3	-0.0229402	0.270952	-0.355934	0.247222
GNAS	-0.117054	-0.224898	0.414948	-0.27154
SMPD1	0.254567	0.144662	-0.174709	0.00361847
SLC20A2	-0.0412491	-0.189697	0.31985	-0.222064
SECISBP2	0.0134064	0.205723	-0.0578813	-0.0451428
TRIP4	0.00924088	-0.144176	-0.213707	0.287014
FHOD1	-0.00190801	0.262731	-0.0989201	-0.023748
RNPS1	-0.070239	-0.197942	-0.0189724	0.144911
VMA21	-0.124127	0.136745	-0.0685407	0.0572187
MEN1	-0.216105	0.0271787	0.118828	-0.0450244
SUCLG2	-0.111801	0.0245495	-0.120054	0.159566
MAST2	-0.174296	0.125197	0.0147009	-0.00222247
KLHDC8B	-0.16719	0.0539505	-0.14544	0.194996
KIF13B	-0.0416491	-0.0681309	0.307767	-0.268132
OXSR1	-0.222376	-0.17821	0.099103	0.0772899
PXN	0.0679612	0.151593	-0.0324107	-0.0683585
EPHA2	0.295675	0.27928	-0.360087	0.113146
LSS	0.251193	0.226669	-0.206691	-0.00147746
FOXN3	0.0254836	-0.138066	0.115074	-0.0631587
C1orf9	-0.0389462	-0.0886531	-0.240243	0.307974
TBL2	-0.10216	-0.0934488	0.0395624	0.0472783
NDUFC2	0.0623185	-0.294882	0.125245	-0.0134425
BIRC2	0.0815032	0.066696	-0.115106	0.0525669
KIAA1279	-0.160331	-0.142576	-0.0855698	0.22509
KLHL9	-0.0150163	-0.126215	0.0706751	-0.00584359
COX6C	0.230753	-0.0501921	-0.294418	0.231749
MLH1	0.061127	0.0107363	0.0626933	-0.0958671
RHOG	-0.107805	0.101118	-0.113043	0.113623
SDC4	-0.179074	-0.167971	-0.217024	0.381354
UBE3A	-0.161332	-0.257725	0.251638	-0.0679392
CSTF3	-0.164336	-0.229974	0.164746	0.0098731
MRPL24	-0.0740803	-0.0478417	-0.173206	0.233668
GPR107	0.290528	0.238231	-0.102398	-0.131621
C10orf119	0.057184	0.072454	0.0418956	-0.102497
C19orf61	0.0150055	0.147725	-0.0979324	0.0236721
SPRY1	-0.0330957	-0.145074	-0.233067	0.325343
GIT1	-0.0254661	0.147605	-0.0518974	-0.00686196
SPRED2	0.000218624	0.284937	-0.0999865	-0.0342709
EZH2	-0.0856936	-0.0829616	0.170859	-0.100658
CD109	-0.0429846	-0.0463177	0.0117587	0.0283343
PPP1R16B	0.151307	0.327045	-0.158257	-0.0580044
FAM38A	0.0756474	0.0767889	0.0509175	-0.121718
KLHL12	0.00532337	0.000839123	0.171107	-0.179789
TSPYL4	-0.0954762	-0.162583	0.197982	-0.0861368
POLA2	0.224503	0.218351	-0.217628	0.0251187
POLR2K	-0.121171	-0.114783	-0.286769	0.403439
IWS1	0.00890292	-0.0321733	0.00424928	0.00739393
NDUFB6	0.0656622	-0.124994	-0.151992	0.190063
SF3B14	-0.0208628	-0.189018	-0.225135	0.333208
ENPP2	-0.105475	-0.134773	-0.0549914	0.166532
EIF2B2	-0.218288	-0.00629124	-0.0234614	0.119374
SLC39A3	0.314918	0.239527	-0.226424	-0.014133
CYFIP2	-0.079491	-0.01137	0.091258	-0.0554615
AVPI1	0.12823	-0.068757	0.0246599	-0.046375
UNC13B	0.0313151	0.227508	0.0551729	-0.180261
GNA13	-0.126162	-0.153147	-0.245172	0.381019
EFHA1	-0.0501971	-0.138527	0.0143913	0.0732086
RBM15B	-0.0551075	0.00576019	0.112217	-0.0957191
JAK1	-0.249406	-0.103788	0.130536	0.0201832
RNF19A	-0.104697	-0.084555	-0.217967	0.310658
MED27	-0.107837	-0.150074	0.180326	-0.0686909
ANKRD13A	-0.144323	-0.0107567	0.0817315	-0.0185579
CEBPG	-0.229741	-0.290152	-0.0669231	0.306368
TYSND1	-0.0336163	0.259991	-0.0643732	-0.0448178
ARIH1	-0.162542	-0.200307	0.0856012	0.0767152
DCAF8	-0.205641	-0.304397	0.137657	0.0912974
RB1	0.0783067	-0.0316103	-0.240737	0.231479
KIFC3	0.0150045	-0.19973	-0.0388754	0.130434
VPS13D	-0.0296751	-0.0333157	0.0264223	0.00125861
PTPN18	0.252393	-0.135924	0.191462	-0.238955
LPCAT4	-0.0373209	0.207285	-0.160615	0.0818476
MTP18	0.0389757	-0.0604465	-0.204289	0.224265
SDHAF1	0.0464554	0.0899515	0.00807648	-0.0714175
PALM	0.0849093	0.0695743	-0.0552922	-0.012183
CHST10	-0.00571163	0.077028	-0.245083	0.218909
FNDC3B	-0.0628846	-0.109002	-0.297732	0.387418
ST6GAL1	-0.0301252	-0.186338	0.0895399	0.0100511
ASAH1	-0.0779447	-0.153313	-0.0165552	0.124091
RAB1A	0.0298963	-0.13778	0.119767	-0.0700163
HN1	-0.11286	-0.129589	-0.226967	0.345179
HSPB7	0.199197	0.259163	-0.187993	-0.0146116
SQLE	-0.131669	-0.161291	-0.160856	0.299988
PFKFB3	0.00352462	0.00148893	-0.175492	0.179473
ZCCHC24	0.171861	0.179931	0.114323	-0.27777
PCYOX1	-0.0250477	-0.18939	0.194845	-0.0996329
FUCA2	0.0560793	-0.193389	-0.076738	0.149247
GPRC5C	0.203473	-0.159235	-0.0169552	0.00870106
ACOT7	0.176041	0.234838	-0.074034	-0.111069
2021-03-06	-0.0914297	0.0158202	-0.0584855	0.0914557
MCTS1	-0.122949	0.0764374	-0.0414806	0.0578503
CD320	0.0705508	0.0788663	-0.168999	0.107097
HUWE1	-0.0853332	-0.0896466	0.284043	-0.214754
SEC14L1	-0.0412229	0.129329	0.111513	-0.160557
RALA	-0.124596	-0.110323	-0.21019	0.323449
NDUFV1	0.198148	-0.170549	-0.0013034	0.000210198
GMFG	-0.0254023	0.309501	-0.0864642	-0.0493364
G6PC3	0.00438999	0.104383	-0.32876	0.288057
CPVL	-0.00802448	0.253163	-0.148193	0.034465
MGLL	0.124334	0.102704	-0.203609	0.108728
ATMIN	-0.187936	-0.331022	0.23397	-0.00301051
PDE6G	0.204075	0.230262	-0.153213	-0.0387088
CTR9	-0.0922491	0.11315	-0.218035	0.209943
LCMT1	0.246866	0.0899442	-0.264243	0.125997
OTUB1	0.0971447	0.253564	-0.269797	0.115815
THRA	-0.0872903	-0.0510547	0.0394023	0.0206878
PLEKHB1	-0.158931	0.187125	-0.106534	0.0868815
GYPC	-0.103162	0.192808	-0.0209397	-0.0279924
KIF1C	0.139607	0.0128812	0.11174	-0.180771
USP15	0.0760435	-0.0785997	0.384395	-0.39203
DHX35	0.217644	-0.0729389	-0.0730381	0.0190848
PHF5A	0.00975075	-0.235445	-0.012437	0.122538
THYN1	-0.111086	-0.0512876	0.00545046	0.0659829
KIAA0664	0.099731	0.0129908	-0.0671065	0.0211407
C20orf4	0.312135	0.242179	-0.0900349	-0.155438
APPL2	-0.0228564	0.164722	0.335675	-0.41747
C9orf25	-0.128216	-0.253596	0.149065	0.0222897
ZDHHC3	-0.00467726	-0.105093	0.00379804	0.0488245
ZER1	0.129224	0.0673078	0.230007	-0.325131
ATF5	0.17913	-0.213884	0.370796	-0.356046
NTN4	-0.0683721	-0.206859	0.173787	-0.0511218
CASP3	0.0155085	-0.173792	-0.0322243	0.110802
KIAA0913	0.0444754	0.033785	0.123925	-0.163373
RNF103	-0.0993702	-0.275118	0.0651012	0.107451
EXD2	-0.141753	0.03441	-0.0406311	0.0852087
SEPN1	0.0595545	0.374514	-0.115911	-0.0860924
CYTH3	-0.128604	0.272806	-0.244987	0.176024
KIF3C	0.0762775	0.260223	0.0971247	-0.258461
ST3GAL4	0.0564	0.279146	-0.236913	0.0865907
ZBTB5	0.0347491	-0.172748	0.46445	-0.411998
TNRC6A	0.0973759	-0.174933	0.103818	-0.0640059
TOB2	0.0717405	-0.0376719	0.228749	-0.248859
SLC4A4	0.172309	0.0175592	0.00615862	-0.0875189
TNFAIP2	0.0391246	-0.171388	0.203947	-0.144815
STMN2	-0.0313383	0.0178454	-0.317058	0.332826
DBI	0.26771	-0.134362	0.207418	-0.262688
LTBR	0.434258	0.096884	-0.083984	-0.142987
TSC22D3	0.0846362	0.152358	-0.189412	0.0867765
EIF4E2	0.0805894	-0.110472	-0.0625212	0.0841261
MIIP	0.23645	0.312874	-0.192654	-0.0514491
TEX10	-0.0265943	-0.114482	0.187475	-0.127549
GLG1	-0.0379521	0.133484	-0.163321	0.120578
AIF1	-0.0201794	0.208954	-0.112134	0.0236233
SFRS4	-0.146862	-0.296789	0.404795	-0.213719
PDCD6	-0.122475	-0.160506	-0.116746	0.250067
ETNK1	0.0502965	-0.1783	-0.0488517	0.115525
CDK7	-0.0146929	0.00244056	0.0305133	-0.0265727
PLEKHJ1	-0.0257983	0.0496349	-0.122042	0.113238
FARSA	0.183249	0.241463	-0.0515148	-0.140622
QRICH1	-0.000376582	0.0318909	-0.11534	0.104154
C6orf129	0.166876	-0.121493	-0.189091	0.184099
ZNF282	-0.0448661	0.0194622	0.157498	-0.153536
NAGLU	0.0961325	0.159108	-0.0297172	-0.0866576
CCL21	-0.022901	0.453113	-0.203047	0.000903951
ZSCAN18	-0.12285	0.332301	0.0936145	-0.20569
TSSC4	0.261489	0.167288	-0.21977	0.036416
PSMG1	-0.075444	-0.0218092	0.0134441	0.0284335
DHX29	-0.0121525	0.0513262	-0.371464	0.364881
CD37	0.183769	0.230305	-0.163642	-0.0193699
EBP	0.317462	-0.184963	-0.00114409	-0.0433009
EGR1	0.0765453	0.00797755	-0.208531	0.17975
DUSP5	0.00853659	0.191705	-0.105088	0.0125548
PSME4	-0.0618644	-0.230645	0.091259	0.0430653
ZNRD1	0.109695	-0.132423	0.108163	-0.0942405
ZNF263	0.0653586	-0.0939429	0.0451975	-0.0289547
KANK2	0.021852	-0.0774776	0.0329531	-0.0058896
IRF8	0.072746	0.300341	-0.0505391	-0.123488
PPFIA1	-0.135537	-0.167562	0.127484	0.0061451
ATXN7L3	-0.148855	-0.0608819	0.256737	-0.173599
ZNF512	0.0720747	0.0402894	0.104807	-0.158363
ZHX3	0.0940213	-0.0831977	0.283065	-0.292486
CCDC3	-0.0757611	0.45127	0.146471	-0.337755
PTPN12	-0.00705014	-0.0916498	-0.140333	0.192541
ZNF828	-0.124798	-0.113997	-0.109641	0.221217
GNAI2	0.0733248	-0.180863	-0.0599505	0.118543
ECM1	0.105044	0.0754335	0.406925	-0.502016
PTP4A1	0.00788313	-0.15372	-0.189106	0.26673
MMS19	-0.00704809	-0.158566	0.236041	-0.164766
MAGT1	0.170647	-0.117021	-0.0585726	0.0452281
ASF1B	0.0541288	0.186385	-0.312188	0.210302
ZCCHC17	-0.00233134	0.00370855	-0.369428	0.381642
IER3IP1	0.102013	-0.0508556	-0.109981	0.0954174
STAU1	-0.0386026	-0.182547	0.0556863	0.0468404
FAM136A	-0.0212479	-0.0749344	-0.00488562	0.050228
IGFBP6	0.0913633	0.0723292	-0.0700457	-0.000962112
CXCL14	0.240858	0.196281	-0.19775	0.00830884
CDO1	0.0164234	-0.206367	0.14549	-0.0578221
ERCC5	0.0480456	0.104749	0.275112	-0.355688
WFDC2	0.270988	0.424912	-0.288542	-0.0208852
SRRT	0.00665847	-0.146878	0.496681	-0.446021
YAP1	0.209948	-0.048366	-0.146184	0.0861801
FOXK2	0.046491	-0.0314405	-0.165505	0.166928
FOLR1	0.123047	0.200079	-0.203223	0.0618177
TBK1	0.26452	0.395427	-0.291033	-0.00133119
DNAL4	0.109506	0.196271	-0.090507	-0.0473222
ERMP1	-0.286493	-0.178859	0.0675132	0.137343
C5orf62	-0.0552499	0.229382	-0.170156	0.0886076
U2AF2	-0.0634271	0.172305	-0.0796557	0.0259463
EIF2B1	0.0840251	-0.137973	-0.0537423	0.0868787
FNBP4	0.000633373	-0.140845	0.276378	-0.218328
NUMB	0.130142	0.343429	-0.123277	-0.0932097
C2orf64	-0.0750087	0.00941707	-0.00310974	0.0302978
SC5DL	-0.121765	-0.177163	0.30131	-0.174976
ZDHHC18	0.132629	0.10835	-0.169476	0.0671662
DCPS	0.048837	-0.0227127	0.0673348	-0.0793262
MOGS	0.115158	0.0810363	-0.128168	0.0449677
STK39	-0.119152	0.256542	-0.415785	0.356716
PATL1	-0.075223	-0.0887618	0.0759192	-0.00398368
TCF3	-0.115827	-0.0172373	-0.111537	0.172639
KCTD2	-0.110471	0.304474	-0.0259196	-0.0737151
MED11	-0.059495	-0.075519	0.0726811	-0.0136628
KRAS	-0.184912	0.00326643	0.316275	-0.25103
TYW1	-0.11203	-0.139314	-0.0746531	0.191845
TMEM216	0.0102927	0.102471	-0.0857155	0.0348796
FGFR3	0.198655	0.383781	-0.0555747	-0.211688
FAM20B	-0.125316	-0.150309	-0.11973	0.249428
C15orf17	-0.0552081	0.0464367	-0.0698161	0.0731174
METTL3	-0.098164	-0.188254	-0.0138655	0.146717
C7	0.249102	0.367244	-0.184073	-0.0919408
ACP5	-0.0139122	0.0758163	0.167066	-0.203726
FBXL3	0.272854	-0.0783337	-0.111189	0.0379066
GGPS1	0.0170901	-0.196327	0.0848094	-0.000134185
PITPNB	-0.0934788	-0.131257	-0.0209072	0.124489
APOC1	0.018545	-0.348273	0.117294	0.0390473
MRPL40	0.0747074	-0.325065	0.0550466	0.0685921
C17orf49	0.020605	-0.218468	0.177926	-0.0873166
SUN1	0.0086628	-0.0801404	0.296375	-0.27175
SIDT2	0.0372093	-0.0308952	0.0658582	-0.0689405
DNAJC7	0.159131	-0.15558	-0.140114	0.153133
CBX7	-0.00175628	0.167772	0.0920383	-0.175615
NR4A1	0.368048	0.00725266	-0.134656	-0.0192976
NUP205	-0.086994	0.0790582	-0.0824148	0.0837997
C7orf11	-0.0136708	-0.212338	0.202341	-0.101102
C10orf54	0.0277957	0.488974	-0.165236	-0.0769472
ZMYM3	-0.30867	-0.227027	0.257476	-0.0266882
NCOA5	-0.0222806	0.0746514	-0.0376081	0.0122552
CDC25B	-0.138713	-0.0254883	-0.0429002	0.115221
MYLIP	0.277532	0.297327	-0.158808	-0.0962989
CPNE2	0.063738	-0.028699	0.111454	-0.128392
STX18	0.060692	-0.0404055	-0.0229799	0.017723
SLC25A22	0.0335358	-0.127254	0.156952	-0.115133
MRPL4	0.117567	0.0197524	-0.078121	0.0217552
IRS2	0.0966312	-0.0816564	-0.22715	0.233869
CELA2B	0.118759	0.21763	0.117237	-0.276613
ZMAT5	0.258157	-0.0875192	-0.0441835	-0.0208247
ADARB1	0.0164776	-0.0278352	-0.0472118	0.0553789
LRRC20	-0.0810388	-0.181182	-0.145887	0.272754
SSFA2	-0.206564	-0.290682	0.377154	-0.162881
IFT52	0.0262836	0.299907	-0.176177	0.0263805
IL1R1	-0.124172	-0.000543713	-0.0689279	0.123981
NCOA7	0.0687043	0.0354381	-0.320623	0.28583
PUS1	0.248432	0.114972	0.237922	-0.406624
RAB11A	-0.0704028	-0.129505	-0.14127	0.238518
ATP6V0A1	0.0035672	-0.234602	-0.273296	0.394793
FNTB	0.0439819	0.122901	-0.0266146	-0.0503828
APOA2	-0.0890517	-0.191137	0.224797	-0.102807
PPIL1	0.0863698	-0.0452054	-0.254684	0.249087
MDK	-0.079739	-0.0323456	-0.260415	0.318849
DCAF12	-0.0987617	-0.198071	-0.0507332	0.189881
SNRPE	-0.0417135	-0.0244544	-0.354054	0.395942
MED17	0.178618	0.205929	0.0306489	-0.206559
RAB11B	0.392085	0.146398	-0.25449	0.0273863
ITPK1	0.00330356	-0.0125879	-0.036398	0.042371
GLRX	0.227997	0.00233331	-0.128319	0.0355751
BASP1	-0.028191	0.0673171	0.00616296	-0.0270225
RPL27	0.097603	-0.10536	-0.220225	0.237745
TBC1D23	-0.204811	-0.155012	0.299309	-0.148591
LSM1	0.350788	0.0672423	-0.186701	0.0128716
BTBD3	-0.0916557	0.0730957	0.111254	-0.111849
UTP11L	-0.118118	-0.0970589	0.0265557	0.0692168
TYMS	-0.0921584	-0.20433	0.227513	-0.0979348
TTYH2	-0.0215883	0.110939	-0.197768	0.160234
PVALB	0.115641	0.430649	-0.105228	-0.147927
NME3	0.278014	0.00964526	-0.0414371	-0.0789938
C11orf48	0.0905154	-0.0428637	-0.116943	0.103611
S100A4	0.194034	0.155664	0.041275	-0.19977
PVRL2	-0.206608	-0.0548448	-0.0183787	0.13265
TCTN1	-0.0812262	-0.0923182	0.00139944	0.077413
MYO1E	0.189365	0.206244	-0.23874	0.0676427
NCOR2	0.289502	0.0917293	-0.22683	0.0684246
IL4R	0.232651	0.00678072	0.0533188	-0.156578
MAPKAPK3	0.111632	0.117207	-0.0325564	-0.0700059
BCL2L11	-0.0790681	-0.196622	0.0472425	0.0794464
ATP2B4	-0.0460009	-0.0426359	-0.34084	0.392856
LYN	-0.0786603	-0.0823184	-0.213899	0.294387
SHKBP1	0.0219008	-0.0910018	-0.122864	0.161935
TNKS	-0.307911	-0.371873	0.209566	0.0925838
TPCN1	-0.156541	-0.115174	0.312562	-0.201916
RAB11FIP1	0.0168432	0.2111	-0.263474	0.16365
BIVM	-0.137411	-0.169903	0.411883	-0.286358
NPRL2	-0.0346661	-0.116858	0.212782	-0.149196
RNF38	-0.130149	-0.143839	0.068882	0.0530774
MEF2A	-0.078406	-0.144226	0.106397	-0.00739162
ENDOD1	-0.150664	0.140321	-0.044447	0.0417375
IFT20	-0.00361054	-0.134124	0.00870709	0.0573213
CD59	-0.21337	-0.0251707	-0.0761465	0.180966
RELA	0.117732	-0.166723	-0.0961813	0.130493
IPO5	0.189374	0.0810319	-0.0655734	-0.0511257
DLD	0.0166656	-0.159174	0.100291	-0.0339361
SF3A3	-0.0927361	-0.17793	0.0750524	0.047387
SRP54	0.219771	-0.0840889	-0.129423	0.0819489
METTL13	0.0860562	0.187168	-0.286451	0.169816
NFS1	0.0200676	-0.0419771	-0.0715728	0.0859185
CFL2	-0.137442	-0.189996	0.0475501	0.100541
ATP6V1A	-0.154647	-0.275877	0.10963	0.0850278
AIMP1	-0.0663424	-0.183622	0.120462	-0.0080024
TK1	0.0406583	0.206624	0.0123489	-0.129775
ARL2	0.0852687	0.331105	-0.112621	-0.0793645
OLFM4	0.0438887	0.00221556	0.0182954	-0.0385176
RBP4	0.0362747	-0.281492	0.222153	-0.109255
CDK5RAP1	0.143695	0.230844	-0.104652	-0.0638026
PRPS2	0.000981246	-0.0263628	0.020919	-0.00933084
C17orf28	0.176974	-0.0142319	-0.102824	0.0387013
PDXK	0.150851	-0.220738	0.134322	-0.0959989
EMP3	0.0116709	0.368997	-0.117325	-0.0617703
DKK1	0.016535	0.117286	-0.23976	0.184564
TTC27	-0.090608	-0.103762	-0.0270192	0.11632
LOC81691	0.134118	-0.0221943	-0.0735279	0.0302908
DGCR14	-0.164877	-0.0796396	0.0532261	0.052906
HPCAL1	0.117882	0.140613	-0.0678537	-0.0474102
ATG5	-0.139778	0.0186329	-0.0800076	0.132765
APH1A	0.0150856	0.100823	-0.167535	0.118359
C2orf7	0.165075	0.019017	-0.0264494	-0.0514154
HDAC3	0.11135	-0.0310259	-0.188318	0.162996
PPFIBP2	0.0537514	-0.0670924	0.338943	-0.341136
HEPH	0.161388	0.272195	-0.0901631	-0.106244
THTPA	0.163822	0.348644	-0.040314	-0.19582
PTX3	-0.0439504	-0.0439956	-0.0235269	0.0641489
NMI	0.253651	0.295533	-0.102451	-0.143705
KLF13	-0.0426504	-0.183461	0.211596	-0.112417
MCRS1	0.115851	0.43106	-0.142822	-0.109296
PPP1R15B	-0.0659784	-0.159155	-0.123606	0.232693
RBL2	-0.0436072	-0.0960375	0.098307	-0.0369763
PRDM4	-0.135638	0.0582439	0.119118	-0.094267
MYOF	-0.0986818	0.023706	-0.173153	0.209413
AZGP1	0.194284	-0.183734	0.441032	-0.449718
MLL4	0.0739772	-0.0219091	0.103954	-0.128225
RFWD2	0.0273251	0.0467136	-0.191041	0.16368
KIAA0528	-0.0218437	-0.016888	-0.115341	0.136779
C1D	0.141074	-0.141308	-0.0219368	0.0315073
DDX50	-0.216863	-0.0561365	0.0107639	0.107429
B3GNT9	0.119261	-0.242749	0.0679335	-0.00331354
CMTM4	0.0270843	0.222341	-0.250058	0.14001
FERMT2	0.230711	-0.0658216	0.134903	-0.205136
CDCA5	-0.110578	0.0627896	-0.0563296	0.0746011
FCHSD2	-0.232696	-0.0367895	0.270022	-0.163641
UHRF2	0.122385	-0.0216695	-0.14307	0.106978
BNIP1	0.0484494	0.105568	0.0281088	-0.100543
FOXJ2	-0.106403	-0.00269705	-0.0545877	0.102682
C14orf159	0.00475098	0.104404	-0.144347	0.0969814
VEZF1	0.0878298	0.0408719	-0.0838324	0.0300017
ATP6V0D1	0.0728244	0.303766	-0.231446	0.0621083
LHFP	0.114131	0.0936528	-0.0771521	-0.01351
KPNA3	0.249484	-0.0491595	-0.00176946	-0.0796132
HEY1	-0.109598	-0.101689	-0.292113	0.397764
BTD	-0.0111698	0.0990647	0.129992	-0.177735
REC8	0.0388983	0.152177	0.0162275	-0.106738
TOE1	-0.0227421	-0.231531	0.0248732	0.0957225
COQ6	0.034138	0.165356	0.155671	-0.255459
TMEM9B	-0.085337	0.0216934	-0.0763285	0.104521
PYCR1	0.130866	0.107329	-0.200907	0.100942
SLC27A2	-0.0250806	-0.183027	0.18824	-0.0958561
DDA1	-0.0570687	-0.0615135	0.0649725	-0.0134734
RAB22A	-0.0627564	0.0578402	-0.0891055	0.0907592
HNRNPAB	-0.334623	-0.196532	0.0316241	0.203332
GSPT1	-0.186172	-0.251171	0.256175	-0.065329
C1orf212	-0.0597769	-0.13751	0.113644	-0.0259953
BCS1L	-0.0058898	-0.259466	0.402393	-0.288713
C19orf22	-0.169596	0.0202612	-0.183774	0.251976
HLA-F	-0.152235	0.248005	-0.140735	0.0900456
KTI12	-0.0211394	-0.0584098	0.0328864	0.00309361
PRPF4B	-0.0537763	0.205537	-0.0879745	0.0144303
C1orf115	0.0608775	-0.29692	-0.101464	0.222851
CAPRIN1	0.0104354	-0.0247728	-0.0870315	0.0976702
PRUNE2	-0.114002	-0.0305067	0.0922062	-0.0326435
ITGA7	-0.0571782	-0.0127379	-0.281176	0.321354
SLC25A42	0.210488	0.0973431	0.0237794	-0.160414
KIAA0146	0.103467	-0.0636915	-0.196562	0.19064
KIAA0430	-0.0324047	-0.104575	0.0853107	-0.0241199
TBC1D13	0.0466681	0.100257	-0.108837	0.0445477
HINFP	0.0805243	-0.0306608	0.051734	-0.0726964
PPP1R10	0.0100845	-0.082869	-0.00780067	0.0438681
ABHD4	0.110213	-0.0281555	-0.267462	0.244022
URGCP	0.176965	0.270893	-0.0108327	-0.194311
CCDC130	0.201263	0.311435	-0.16695	-0.0625264
ANKRD27	-0.22582	0.003341	-0.223023	0.324492
NOTCH1	0.0588457	0.0365439	-0.117505	0.0791751
ERF	0.0557258	0.374553	-0.36357	0.171893
ACACA	-0.0255766	-0.203905	0.186888	-0.0841579
SMAD3	-0.240487	-0.0398454	0.0591523	0.0594239
ANGPTL2	-0.0246623	0.0870189	0.0920618	-0.126958
HNRNPUL1	-0.00537283	-0.109093	-0.215984	0.27858
TAX1BP1	0.096846	0.113934	-0.204089	0.115391
EIF3L	0.258061	0.0653883	-0.0739874	-0.0638192
IFRD2	-0.107007	-0.192989	0.0559304	0.0804783
MYL2	0.176738	0.074977	-0.0798723	-0.0280686
NDUFB4	0.0832024	0.303634	-0.0923432	-0.0862107
RPRD1B	0.146591	0.00506125	-0.187171	0.12951
TRIAP1	-0.20104	-0.30139	0.202961	0.0202977
PSG9	-0.0963491	0.089896	-0.114656	0.115886
NDUFV2	-0.0947406	-0.168178	0.0833588	0.0349208
EIF4EBP1	0.126679	-0.136135	0.106271	-0.0976491
MRPL45	-0.104069	-0.135433	0.0181891	0.090498
UBL3	-0.106574	-0.197327	0.0294072	0.10985
APBB3	0.0200732	0.0628849	-0.00453582	-0.0341565
FXYD5	-0.101235	0.608913	-0.256952	0.0144526
HK1	-0.247493	0.125417	-0.0760517	0.122489
CDKN2A	-0.118814	0.00181851	-0.492126	0.558696
SEMA4B	0.26457	0.0546765	0.00902552	-0.147327
TACC3	0.211322	0.0986363	-0.255482	0.127716
CCDC25	-0.0369801	-0.112017	0.351089	-0.293742
RPP25	-0.0792337	0.127814	0.104093	-0.136116
PLAC9	0.183887	0.343146	-0.151079	-0.0869536
HSD11B2	-0.0900268	-0.111955	0.252349	-0.169183
PAFAH1B3	-0.028996	0.289061	-0.110149	-0.0134243
PDLIM2	0.0787957	0.317847	0.0801533	-0.269798
KIAA0182	-0.00398343	-0.16946	0.0594509	0.0220215
HEG1	0.261526	0.406351	-0.273983	-0.0229978
TMUB1	0.200129	0.164132	-0.0956106	-0.0647217
RBM33	-0.0127085	0.0337858	-0.0538202	0.04475
ACADSB	0.236179	-0.100319	0.259081	-0.319328
LRP11	0.0585606	0.295439	-0.0959688	-0.0681064
SLC16A2	-0.0615194	-0.238318	0.42922	-0.303248
SLC25A10	0.0125404	-0.180752	0.166907	-0.0907345
CD93	-0.0598006	0.0851952	-0.197611	0.188625
ACAP2	-0.255815	-0.180609	-0.0158464	0.211551
SESN2	0.0418922	0.0175293	0.164017	-0.195934
WWC3	-0.240159	0.0468318	-0.175979	0.26082
SGSM2	-0.217142	-0.05594	0.517224	-0.416862
NAPB	-0.0588476	-0.0148455	-0.103018	0.138638
TSPAN3	-0.134482	0.0276036	0.300798	-0.268034
SCAMP4	0.10034	0.181625	-0.0461393	-0.0823113
GRB2	-0.0901214	0.344629	-0.338963	0.222379
LMOD1	-0.105282	-0.00654368	-0.294598	0.35254
NHP2	-0.0930593	-0.160853	-0.294384	0.421731
DAZAP2	-0.000570596	-0.219076	-0.133678	0.244495
RPS9	0.161347	0.181385	-0.0270508	-0.127682
TUBGCP2	0.205441	0.085416	-0.137464	0.0144055
CNOT7	-0.0967912	-0.184535	0.202523	-0.0796753
S100P	-0.138337	-0.046262	-0.204316	0.292207
TUSC2	0.0530967	0.202673	-0.283234	0.172891
NLRP2	0.0128899	0.113101	-0.134611	0.0792672
VPS33B	-0.0501711	-0.0339247	0.135457	-0.102683
ERP44	-0.121789	-0.0999636	0.0981917	-0.0019927
USF2	0.320291	0.039408	-0.0250867	-0.12813
PEG10	-0.0801368	-0.0591592	0.00956871	0.052473
COIL	-0.127619	-0.29613	0.234429	-0.0457803
HS6ST1	-0.0345189	-0.0454083	-0.072292	0.111339
ST6GALNAC6	0.140269	-0.0296891	0.126481	-0.175741
LYPLA1	-0.0967791	-0.192713	-0.134763	0.273447
FDPS	0.146027	-0.0714618	0.0815898	-0.111509
ZZZ3	-0.0114705	-0.154733	0.15227	-0.0780291
LAMA5	0.00146349	0.0764796	0.153405	-0.196387
GALNT14	0.218271	-0.0451652	-0.108303	0.0419077
NRBF2	0.0867177	-0.127642	0.0869427	-0.0648936
DHRS7B	0.0873209	0.328882	-0.238375	0.051031
WDR5	0.271129	0.358625	-0.144129	-0.138416
PRKAG2	-0.00494545	0.0196346	-0.126443	0.123498
DGKZ	0.20924	0.167065	-0.145445	-0.0183893
PSD4	0.0692337	0.267512	0.156258	-0.32023
PARP4	0.157914	-0.0903748	0.0687083	-0.0940464
AIFM1	-0.0528651	-0.196355	0.223002	-0.113687
C2orf68	-0.128023	-0.0612302	0.247221	-0.172364
ZHX2	-0.153626	-0.236921	-0.162639	0.34764
ZFYVE20	-0.0750539	-0.239189	0.0467767	0.0988061
NUDT2	-0.00969984	0.0494293	0.0259025	-0.0466112
TRIM26	-0.0948437	0.0856869	0.0321512	-0.0346982
PREPL	-0.19324	-0.145149	0.124988	0.0222298
JUN	0.157867	0.0543214	-0.324282	0.242895
TGM2	0.170509	-0.015877	-0.230091	0.173976
PNP	0.0265817	-0.0480824	0.336409	-0.336242
NUDT21	0.00808949	-0.0743821	0.182459	-0.156358
RFC3	-0.192452	-0.0858591	-0.195273	0.324798
BZW2	-0.0544185	-0.0493185	-0.214436	0.268775
TMBIM6	-0.125888	-0.347982	0.128575	0.088131
STXBP2	-0.125729	0.162068	0.00115074	-0.0264912
CRYBA1	0.014183	0.300836	-0.0153636	-0.135449
NDUFAF3	0.113588	-0.127326	-0.109081	0.126557
GPKOW	-0.161517	-0.147911	0.0377736	0.100477
C14orf166	0.00940415	-0.20455	0.0218243	0.0722856
NONO	0.0119236	-0.174104	-0.196396	0.282424
PLA2G2A	-0.00301618	-0.113331	-0.253418	0.318388
ECSIT	-0.100128	-0.0199753	0.046428	0.0038094
TST	0.0617338	-0.208846	0.262564	-0.19693
FCER1G	-0.146168	-0.0697088	0.297182	-0.212337
CLPTM1L	-0.0338022	-0.262641	0.131293	0.00524859
TMEM115	-0.150775	-0.15487	0.148304	-0.0151169
CCNB1IP1	-0.00846579	-0.238514	0.399493	-0.29475
SMARCA5	0.12137	0.0437205	-0.150188	0.0831768
ACD	0.0625958	0.234766	-0.260333	0.129669
HSDL2	-0.115393	-0.219517	0.201039	-0.0533907
SOD3	-0.0606102	0.351245	-0.223466	0.0871688
EMD	0.201853	0.235262	-0.126684	-0.0676515
ZNF32	0.0913027	0.110377	-0.0451695	-0.0450757
SAPS1	0.0141181	0.177407	-0.242944	0.159827
SASH1	0.119149	-0.021551	-0.0344973	-0.00411446
[truncated: 17,041 more rows]
